# Supplementary material for: Semen quality of 1559 young men from four cities in Japan: a cross-sectional population-based study
Source: PubMed Central journal article supplement — BMJ Open. 2013 Apr 29;3(4):e002222. doi: 10.1136/bmjopen-2012-002222 (PMC3641477; doi:10.1136/bmjopen-2012-002222), 2013-04-29
Supplement: bmjopen-2012-002222.draft_revisions.pdf [file bmjopen-2012-002222.draft_revisions.pdf]

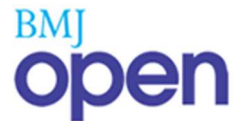

## Semen quality of 1,559 young men from four cities in Japan

|                                 |                                                                                                                                                                                                                                                                                                                                                                                                                                                                                                                                                                                                                                                                                                                                                                                                                                                                                                                                                                                                                                                                                                                                                                                                                                                                                                                                                                                                                                                                                                                                                                                                                                                                                                                                                                                                                                                                                                                                                                |
|---------------------------------|----------------------------------------------------------------------------------------------------------------------------------------------------------------------------------------------------------------------------------------------------------------------------------------------------------------------------------------------------------------------------------------------------------------------------------------------------------------------------------------------------------------------------------------------------------------------------------------------------------------------------------------------------------------------------------------------------------------------------------------------------------------------------------------------------------------------------------------------------------------------------------------------------------------------------------------------------------------------------------------------------------------------------------------------------------------------------------------------------------------------------------------------------------------------------------------------------------------------------------------------------------------------------------------------------------------------------------------------------------------------------------------------------------------------------------------------------------------------------------------------------------------------------------------------------------------------------------------------------------------------------------------------------------------------------------------------------------------------------------------------------------------------------------------------------------------------------------------------------------------------------------------------------------------------------------------------------------------|
| Journal:                        | <i>BMJ Open</i>                                                                                                                                                                                                                                                                                                                                                                                                                                                                                                                                                                                                                                                                                                                                                                                                                                                                                                                                                                                                                                                                                                                                                                                                                                                                                                                                                                                                                                                                                                                                                                                                                                                                                                                                                                                                                                                                                                                                                |
| Manuscript ID:                  | bmjopen-2012-002222                                                                                                                                                                                                                                                                                                                                                                                                                                                                                                                                                                                                                                                                                                                                                                                                                                                                                                                                                                                                                                                                                                                                                                                                                                                                                                                                                                                                                                                                                                                                                                                                                                                                                                                                                                                                                                                                                                                                            |
| Article Type:                   | Research                                                                                                                                                                                                                                                                                                                                                                                                                                                                                                                                                                                                                                                                                                                                                                                                                                                                                                                                                                                                                                                                                                                                                                                                                                                                                                                                                                                                                                                                                                                                                                                                                                                                                                                                                                                                                                                                                                                                                       |
| Date Submitted by the Author:   | 13-Oct-2012                                                                                                                                                                                                                                                                                                                                                                                                                                                                                                                                                                                                                                                                                                                                                                                                                                                                                                                                                                                                                                                                                                                                                                                                                                                                                                                                                                                                                                                                                                                                                                                                                                                                                                                                                                                                                                                                                                                                                    |
| Complete List of Authors:       | <p>Iwamoto, Teruaki; International University of Health and Welfare Hospital, Division of Male Infertility, Centre for Infertility and IVF<br/>         Nozawa, Shiari; St. Marianna University School of Medicine, Department of Urology<br/>         Naka-Mieno, Makiko; Jichi Medical University, Department of Medical Informatics, Center of Information<br/>         Yamakawa, Katsunori; St. Marianna University School of Medicine, Department of Urology<br/>         Baba, Katsuyuki; St. Marianna University School of Medicine, Department of Urology<br/>         Yoshiike, Miki; St. Marianna University School of Medicine, Department of Urology<br/>         Namiki, Mikio; Kanazawa University Graduate School of Medical Science, Department of Urology<br/>         Koh, Eitetsu; Kanazawa University Graduate School of Medical Science, Department of Urology<br/>         Kanaya, Jiro; Kanazawa University Graduate School of Medical Science, Department of Urology<br/>         Okuyama, Akihiko; Osaka University Graduate School of Medicine, Department of Urology<br/>         Matsumiya, Kiyomi; Osaka University Graduate School of Medicine, Department of Urology<br/>         Tsujimura, Akira; Osaka University Graduate School of Medicine, Department of Urology<br/>         Kanetake, Hiroshi; Nagasaki University, Department of Urology<br/>         Eguchi, Jiro; Nagasaki University, Department of Urology<br/>         Skakkebaek, Niels; University of Copenhagen, University Department of Growth and Reproduction, Rigshospitalet, Faculty of Health Sciences<br/>         Vierula, Matti; University of Turku, Department of Physiology and Paediatrics<br/>         Toppari, Jorma; University of Turku, Department of Physiology and Paediatrics<br/>         Jørgensen, Niels; University of Copenhagen, University Department of Growth and Reproduction, Rigshospitalet, Faculty of Health Sciences</p> |
| <b>Primary Subject Heading</b>: | Epidemiology                                                                                                                                                                                                                                                                                                                                                                                                                                                                                                                                                                                                                                                                                                                                                                                                                                                                                                                                                                                                                                                                                                                                                                                                                                                                                                                                                                                                                                                                                                                                                                                                                                                                                                                                                                                                                                                                                                                                                   |
| Secondary Subject Heading:      | Reproductive medicine, Epidemiology, Diabetes and endocrinology, Public health                                                                                                                                                                                                                                                                                                                                                                                                                                                                                                                                                                                                                                                                                                                                                                                                                                                                                                                                                                                                                                                                                                                                                                                                                                                                                                                                                                                                                                                                                                                                                                                                                                                                                                                                                                                                                                                                                 |
| Keywords:                       | semen quality, reproductive hormones, young men, REPRODUCTIVE MEDICINE, Adult urology < UROLOGY                                                                                                                                                                                                                                                                                                                                                                                                                                                                                                                                                                                                                                                                                                                                                                                                                                                                                                                                                                                                                                                                                                                                                                                                                                                                                                                                                                                                                                                                                                                                                                                                                                                                                                                                                                                                                                                                |

1  
2  
3  
4  
5  
6  
7  
8  
9  
10  
11  
12  
13  
14  
15  
16  
17  
18  
19  
20  
21  
22  
23  
24  
25  
26  
27  
28  
29  
30  
31  
32  
33  
34  
35  
36  
37  
38  
39  
40  
41  
42  
43  
44  
45  
46  
47  
48  
49  
50  
51  
52  
53  
54  
55  
56  
57  
58  
59  
60

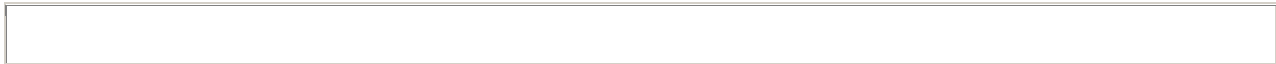

SCHOLARONE™  
Manuscripts

For peer review only

**Title:**

Semen quality of 1,559 young men from four cities in Japan

**Study design:**

Cross sectional population-based study

**Authors**

Teruaki Iwamoto<sup>1,2</sup>, Shiari Nozawa<sup>2</sup>, Makiko Naka Mieno<sup>3</sup>, Katsunori Yamakawa<sup>2</sup>, Katsuyuki Baba<sup>2</sup>, Miki Yoshiike<sup>2</sup>, Mikio Namiki<sup>4</sup>, Eitetsu Koh<sup>4</sup>, Jiro Kanaya<sup>4</sup>, Akihiko Okuyama<sup>5</sup>, Kiyomi Matsumiya<sup>5</sup>, Akira Tsujimura<sup>5</sup>, Hiroshi Kanetake<sup>6</sup>, Jiro Eguchi<sup>6</sup>, Niels E. Skakkebaek<sup>7</sup>, Matti Vierula<sup>8</sup>, Jorma Toppari<sup>8</sup>, and Niels Jørgensen<sup>7</sup>

**From:**

<sup>1</sup> Division of Male Infertility, Centre for Infertility and IVF, International University of Health and Welfare Hospital, Nasushiobara, Japan

<sup>2</sup> Department of Urology, St. Marianna University School of Medicine, Kawasaki, Japan

<sup>3</sup> Department of Medical Informatics, Centre for Information, Jichi Medical University, Shimotsuke, Japan

<sup>4</sup> Department of Urology, Kanazawa University Graduate School of Medical Science, Kanazawa, Japan

<sup>5</sup> Department of Urology, Osaka University Graduate School of Medicine, Osaka, Japan

<sup>6</sup> Department of Urology, Nagasaki University, Nagasaki, Japan

<sup>7</sup> University Department of Growth and Reproduction, Rigshospitalet, DK-2100 Copenhagen, Denmark

<sup>8</sup> Departments of Physiology and Paediatrics, University of Turku, FI-20520 Turku, Finland

**Correspondence:**

Professor Teruaki Iwamoto

Division of Male Infertility, Centre for Infertility and IVF, International University of Health and Welfare Hospital, Nasushiobara, 329-2763, Japan

Tel: +81 287 37 2221

Fax: +81 287 39 3001

Email: t4iwa@iuhw.ac.jp

**Key words:**

Semen quality, reproductive hormones, young men

**Word count:**

Abstract: 244

Main text: 3630

**Subject heading:**

Semen quality and reproductive hormones in Japanese young men.

## ARTICLE SUMMARY

### Article focus:

- There has only been one Japanese study reporting semen quality of presumably normal young men indicating good semen quality compared with men from Europe.
- To establish the frequency of impaired semen quality among normal young Japanese men.

### Key messages:

- Semen quality of the young men was significantly poorer than that of partners of pregnant women, and 32% may have reduced fertility chances.
- Semen quality was highly variable.
- These results will serve as a reference for future studies on time trends in semen quality in Japan and for comparison with future studies of university students in other countries.

### Strengths and limitations:

- Large-scale prospective study of semen quality among Japanese young men.
- Standardised inclusion criteria and investigation procedures.
- Lack of influence of ethnicity and genetic background on semen quality.
- Relatively low participation rate limits the possibility to generalize the results for the whole population, which is the common problem for all semen studies

**ABSTRACT**

**Objectives:** To provide information of semen quality among normal young Japanese men and indicate the frequency of reduced semen quality.

**Design:** Cross-sectional, coordinated studies of Japanese young men included from university areas. The men had to be 18 to 24 years, and both the man and his mother had to be born in Japan. Background information was obtained from questionnaires. Standardized and quality controlled semen analyses were performed, reproductive hormones analyzed centrally and results adjusted for confounding factors.

**Setting:** Four study centres in Japan (Kawasaki, Osaka, Kanazawa and Nagasaki).

**Participants:** 1,559 men, median age 21.1 years, included during 1999-2003.

**Outcome measures:** Semen volume, sperm concentration, total sperm count, sperm motility, sperm morphology and reproductive hormone levels.

**Results:** Median sperm concentration was 59 (95% confidence interval 52-68) million/mL, and 9.0% and 31.9% had less than 15 and 40 million/mL, respectively. Median percentage of morphologically normal spermatozoa was 9.6 (8.8-10.3) %. Small but statistically significant differences were detected for both semen and reproductive hormone variables between men from the four cities. Overall, the semen values were lower than those of a reference population of 792 fertile Japanese men.

**Conclusions:** Assuming the investigated men were representative for young Japanese men, a significant proportion of the population had suboptimal semen quality with reduced fertility potential, and as a group they had lower semen quality than fertile men. However, the definitive role – if any - of low semen quality for subfertility and low fertility rates remains to be investigated.

## INTRODUCTION

Whether there has been a global decreasing trend in semen quality remains still controversial. In contrast, there is a consensus that regional differences exist.<sup>1-7</sup> Cross-sectional, coordinated studies of young men from the general populations have shown that men from the Western part of the Northern European countries have lower semen quality than men from the Eastern part or men from Southern Spain,<sup>4-8</sup> which is inversely correlated with the testicular cancer incidences.<sup>8,9</sup>

There has only been one Japanese study reporting semen quality of presumably normal young men<sup>10</sup> indicating good semen quality compared with men from Europe. However, the authors concluded that their results might be flawed by a selection bias and lack of ability to account for confounding factors, and they requested well-designed prospective studies to be performed in several regions of Japan.

Here, we present the results of prospectively designed, cross-sectional studies of young university students from four different provinces in Japan. Our objectives were to elucidate if reduced semen quality were frequent among Japanese men unselected for their fertility status, to examine possible regional differences, to provide a reference for future studies on time trends in semen quality, and to compare the results with those obtained in other countries.

## METHODS

The investigations took place at four study centres based in departments of urology at university hospitals in Kawasaki, Osaka, Kanazawa and Nagasaki in Japan. The investigation procedures described below were the same as those of the previously published European studies<sup>4,5,7</sup> except for the selection of study populations and assessment of semen volume.

### Study populations of young men

University students were informed about the study through posters placed in several conspicuous places on the campuses of the universities connected to the four study centres. Serially numbered leaflets giving detailed information about the study were attached to the posters. A candidate volunteer had to call the study centre, inform the serial number printed on his copy of the leaflet to make an appointment for the investigations approximately one week later, and to receive a package of documents within days by mail. The package included further written information, a questionnaire and the instruction to preferably abstain from ejaculation for at least 48 hours prior to producing the semen sample for the study. Further inclusion criteria were that the man was 18-24 years, and that both he and his mother were born in Japan. Failure to comply with the request for ejaculation abstinence period was not a reason for exclusion, but the abstinence time was recorded according to the information given by the study subjects at the time of the semen sample delivery. On the day of attendance that was set at a certain time in the morning, the man returned the completed questionnaire, underwent a physical examination, provided a semen sample and had a blood sample drawn.

The study in Kawasaki covered two separate periods: May 1999 to April 2000 and April 2002 to May 2003, and the study periods in Osaka, Kanazawa, and Nagasaki were September 2002 to October 2003, July 2002 to June 2003, and July 2002 to July 2003, respectively. In total 9,374 leaflets were taken by the students and 1,559 (16.6%) participated; 14.5% (658/4,534) from Kawasaki, 11.7% (300/2,570) from Osaka, 21.9% (300/1,371) from Kanazawa, and 33.3% (301/899) from Nagasaki.

### Questionnaires

The questionnaire included information on age and previous or current diseases, including any known history of fertility. To assure the quality of the information regarding previous



1  
2  
3  
4  
5 conditions the men were asked to fill in the questionnaire – if possible – in collaboration with  
6 their parents.  
7  
8  
9

### 10 11 **Physical examination**

12  
13 The participants had their testes size measured by use of a Prader orchidometer  
14 (Pharmacia & Upjohn, Copenhagen, Denmark). The presence of varicocele or other scrotal  
15 abnormalities and the Tanner stage of pubic hair were evaluated. Body weight and height  
16 were self-reported, and body mass index (BMI) was calculated as weight in kilograms di-  
17 vided by squared height in meters.  
18  
19  
20  
21  
22  
23

### 24 25 **Semen samples**

26 The ejaculation abstinence period was calculated as the time between the current and pre-  
27 vious ejaculation based on self-reported information from the men. Semen samples were  
28 collected at the laboratory and kept at 37°C during liquefaction. Semen volume was as-  
29 sessed by aspirating the entire sample into a graduated 5ml syringe (TERUMO, Tokyo).  
30 Sperm motility was assessed on 10 µl of well-mixed semen placed on a clean glass slide,  
31 covered with a 22x22 mm coverslip, and then examined at a total magnification of 400 times  
32 on the heating stage at 37°C of a microscope. The sperm were classified as either motile  
33 (WHO motility classes A, B or C) or immotile (class D), in order to record the proportion of  
34 motile sperm.<sup>11</sup> The motility assessment was repeated on a second 10 µl aliquot of semen,  
35 and the average value of the two samples was calculated. For the assessment of sperm  
36 concentration the samples were diluted in a solution of 0.6 mol/L NaHCO<sub>3</sub> and 0.4% (v/v)  
37 formaldehyde in distilled water, subsequently assessed using Bürker-Türk haemocytome-  
38 ters. Only sperm with tails were counted. Smears were prepared for morphological evalua-  
39 tion, Papanicolaou stained and finally assessed according to strict criteria<sup>12</sup> by one examiner  
40 (MV) in Finland between 2009 and 2010.  
41  
42  
43  
44  
45  
46  
47  
48  
49  
50  
51  
52  
53  
54  
55  
56  
57  
58  
59  
60

### Quality control of sperm concentration assessment

Inter-laboratory variation in assessment of sperm concentration was monitored by an external quality control (QC) programme coordinated by the Department of Growth and Reproduction Copenhagen, Denmark<sup>34</sup> during the study period.

### Blood samples

A blood sample was drawn from a cubital vein of each participant usually in the morning to reduce the effect of diurnal variation in hormone levels, and the serum was separated by centrifugation after clotting and stored at  $-20^{\circ}\text{C}$ . The frozen serum was sent to the Department of Growth and Reproduction, Rigshospitalet, in Copenhagen, Denmark for a centralised hormone analysis. Levels of testosterone, FSH, LH and sex hormone-binding globulin (SHBG) were determined using a time-resolved immunofluorometric assay (Delfia, Wallac, Turku, Finland). Inhibin-B was measured by a specific two-sided enzyme immuno-metric assay (Serotec, UK). Intra- and inter-assay coefficients of variations (CV) for measurements of both FSH and LH were 3% and 4.5%, respectively. CVs for both testosterone and SHBG were <8% and <5%, respectively. The intra- and inter-assay CVs for inhibin-B were 15% and 18%. Free testosterone (cFT) was calculated from total testosterone and SHBG using fixed albumin level of 43.8 g/L as described by Vermeulen.<sup>13</sup>

### Comparison population: Fertile men (partners of pregnant women)

From January 1999 to February 2002, our group also examined the semen quality of 792 fertile men (partners of pregnant women) (a manuscript describing these have been submitted in parallel). Participation of these men was similar to that of current study population of young men: they answered a questionnaire, delivered a semen sample, and had a physical examination performed. The results of their semen analyses were used for comparison to that of the young men.

### Statistical analysis

Standard statistics (mean, median, standard deviation (SD), 5-95 percentiles and frequencies) were used for description (Tables 1-3). Between-group differences for continuous variables giving the basic description of the study population were tested by the non-parametric Kruskal-Wallis test. Between-group differences for categorical variables were tested with the Fisher's exact test.

The main outcome variables were the assessed semen and hormone variables, and the between group differences were tested by multiple linear regression (Tables 2 and 3). Semen volume, sperm concentration and total sperm counts were best normalised by cubic root transformation before analysis to correct for skewed distribution of residuals. The percentages of motile spermatozoa were logit-transformed. Percentages of morphologically normal spermatozoa entered the model untransformed. Ejaculation abstinence up to 96 hours had a linear increasing effect and abstinence above 96 hours a slight, but significant non-linear increasing effect on semen volume, sperm concentrations and total sperm counts. Abstinence therefore entered the model as a covariate as linear splines and abstinence-squared for the part above 96 hours. For motility, winter season was associated with lower motility percentages and season was therefore included as a covariate. For all semen variables increasing age tended to be slightly, but negatively associated with semen variables and age was also included in the models. Duration from ejaculation to assessment was additionally evaluated as a confounder for motility, but found to be non-significant, and therefore not included.

Natural logarithmic transformation gave models in which differences between centres and effects of covariates are more easily interpretable. This alternative model approximate closely the model obtained by cubic root transformation and is used when reporting adjusted semen volumes, sperm concentrations and total sperm counts to represent a 21-year-old man having an ejaculation abstinence period of 96 hours. QC results did not show any significant inter-laboratory differences, changes during the study period or difference to the

1  
2  
3  
4  
5  
6 reference laboratory. Therefore, corrections of data were not needed to make them com-  
7  
8 parable. The logit-transformed motility data and untransformed morphology percentages  
9  
10 were used to give adjusted levels for a 21-years-old man for these variables.

11 Differences with  $p < 0.05$  were considered statistically significant. All statistical anal-  
12  
13 yses were done twice: MNM using SAS version 9.1.3 (SAS Institute Inc., Cary, NC, USA)  
14  
15 and NJ using PASW version 18.

## 16 17 18 19 **RESULTS**

20 A description of the study population is summarized in Table 1. Few men had caused a  
21  
22 pregnancy or experienced infertility problems, in total 4.7%. During the preceding 3 months  
23  
24 to participation in the study, 10.4% had used medications which were mainly antibiotics,  
25  
26 painkillers, asthma or allergy medicines.

27  
28 Semen results are shown in Table 2. "Observed" values are based on raw data, and  
29  
30 "Adjusted" are the estimates from regression analyses taking covariates into account.  
31  
32 Sperm concentrations did not differ between men from the four study centres, whereas the  
33  
34 semen volume for men from Kanazawa was higher than in other centres ( $p < 0.0001-0.02$  in  
35  
36 pair-wise comparisons). Consequently, also total sperm counts were higher for these men,  
37  
38 but only significantly in the pair-wise comparison with men from Kawasaki ( $p < 0.02$ ). The  
39  
40 percentages of motile spermatozoa differed significantly, because men from Nagasaki had  
41  
42 higher frequencies of motile spermatozoa than men from other centres (adjusted medians  
43  
44 64-75%). The percentage of morphologically normal spermatozoa for men from Nagasaki  
45  
46 was higher than that from Osaka ( $p < 0.0001$  in pair-wise comparison).

47 Cumulated, 2.2% of men had a sperm concentration below 5 million/mL, 4.9% below  
48  
49 10 million/mL, 9.0% below 15 million/mL and 31.9% below 40 million/mL. For morphology  
50  
51 5.7% of men had normal spermatozoa below 5%. Figure 1 summarizes the distribution of  
52  
53 the sperm concentration, total sperm counts, percentages and total numbers of morpho-  
54  
55 logically normal spermatozoa.

1  
2  
3  
4  
5  
6  
7  
8  
9  
10  
11  
12  
13  
14  
15  
16  
17  
18  
19  
20  
21  
22  
23  
24  
25  
26  
27  
28  
29  
30  
31  
32  
33  
34  
35  
36  
37  
38  
39  
40  
41  
42  
43  
44  
45  
46  
47  
48  
49  
50  
51  
52  
53  
54  
55  
56  
57  
58  
59  
60

Figure 1 summarises the semen results of the young men in comparison to that of the 792 fertile men. The semen variables differed between these groups, with fertile men having higher semen volume ( $p < 0.002$ ), sperm concentration ( $p < 0.0001$ ), total sperm count ( $p < 0.0001$ ), total number of morphologically normal spermatozoa ( $p < 0.0001$ ) than young men, while the percentage of normal spermatozoa did not differ between the groups ( $p = 0.05$ ).

The semen variables of men whose mothers had smoked during pregnancy did not significantly differ from non-exposed men, but the number of smoking mother was very small. The men's own smoking or drinking habits (not shown in Table), previous experience of cryptorchidism, testicular torsion, orchitis, sexually transmitted diseases (chlamydia, gonorrhoea or epididymitis) or previous fertility experience did not affect their semen variables.

Reproductive hormone levels differed between the groups of young men (Table 3). Men from Kawasaki and Osaka had slightly higher FSH ( $p < 0.0001-0.049$ ) and inhibin-B ( $p < 0.003-0.01$ ) levels than men from Kanazawa and Nagasaki. A similar pattern was seen for total testosterone (all  $p < 0.0001$ ), SHBG (all  $p < 0.0001$ ) and cFT (all  $p < 0.0001$ ).

For the entire group of men the median (5-95 percentiles) sizes of the left and right testes were both 22 ml (14-28 ml). The average testis size (mean of left and right) differed significantly between the study groups, ranging from 19 to 23 ml in medians (Table 1). Overall 98.8% of study subjects had a pubic hair distribution of Tanner stage 4 or higher: Kawasaki 98.2%, Osaka 98.0%, Kanazawa 100% and Nagasaki 99.7%.

During the physical examination 27.1% of men was diagnosed with a varicocele; 14.3% stage 1, 9.1% stage 2, and 3.7% stage 3. Varicocele was on the left side in 26.5% and on the right in 3.5% of men. In 9 men (0.6 % of the entire study population) the right varicocele was not concomitant with a left one. The presence of a varicocele was non-significantly associated with an 8% (95% confidence interval -20%;+6%) reduction in sperm concentration and 11% decline (-23%;+4%) in total sperm count. No tendencies

1  
2  
3  
4  
5 could be detected for sperm motility or morphology. Inhibin-B and total testosterone tended  
6 to be lower in men having a varicocele, however, non-significantly ( $p>0.05$ ).  
7  
8  
9

## 10 11 12 13 **DISCUSSION**

14 Sperm concentration, total sperm count, percentage of morphologically normal spermatozoa  
15 and percentage of motile spermatozoa varied tremendously between individual participants.  
16 However, only small but statistically significant differences were detected for both semen  
17 and reproductive hormone levels between young men from the four provinces in Japan.  
18 Thus, from a biological point of view these groups of men can be regarded as similar. The  
19 most important finding is that semen quality of the young men was significantly poorer than  
20 that of partners of pregnant women.  
21  
22  
23  
24  
25  
26  
27

28 To our knowledge, this is the first large-scale prospectively designed study to explore  
29 potential differences in testicular function parameters in Japanese men that were not se-  
30 lected by any fertility status. The men were enrolled by the same type of advertisement.  
31 They were all university students. We tested for effects of various covariates and accounted  
32 for these when necessary. Thus, the comparison between the four groups is valid, and the  
33 results may serve as a reference for future studies on time trends in semen quality.  
34  
35  
36  
37  
38

39 In Japan, there is not a compulsory medical examination of young men as in the  
40 Northern-European countries,<sup>4,7</sup> which makes it difficult to recruit men that are representa-  
41 tive for the general population. Itoh *et al*<sup>10</sup> detected a median sperm concentration of 81  
42 million/mL in 207 young men (18-22 years old) examined in 1998 in Sapporo but also con-  
43 cluded that selection bias in the recruitment and variable ejaculation abstinence might have  
44 affected the results. In the design of our study, we therefore decided to restrict the invitation  
45 to university students to get a well-characterized study population. Men who have experi-  
46 enced fertility problems may be more likely to volunteer for semen studies than men without  
47 any problems.<sup>14</sup> We restricted the age of participants to 18-24 years assuming that the ma-  
48 jority in such a group would not yet have any direct knowledge about their own fertility  
49  
50  
51  
52  
53  
54  
55  
56  
57  
58  
59  
60

1  
2  
3  
4  
5 chances, since the average Japanese man fathers his first child at the age of 31.8 years.<sup>15</sup>  
6  
7 Less than 1% of the participants had experienced fertility problems, and such problems are  
8  
9 therefore unlikely to severely bias the obtained results. Poorly educated men may be more  
10  
11 likely to refuse participation in studies that require delivery of semen samples.<sup>16</sup> However,  
12  
13 higher educational level has been positively associated with semen quality.<sup>16 17</sup> Thus, the  
14  
15 selection of university students may bias the results towards a higher level.

16  
17 There were small differences in inhibin-B levels that were lower in men from Kana-  
18  
19 zawa and Nagasaki than in men from Kawasaki and Osaka. Similar trends were detected for  
20  
21 total testosterone, SHBG, and cFT. The slightly higher inhibin-B levels in men from Kawa-  
22  
23 saki and Osaka could theoretically indicate a higher spermatogenic activity in these, which  
24  
25 however does not fit with the sperm count findings. Also, we hesitate to draw such a con-  
26  
27 clusion since the detected inhibin-B concentrations at this level do not correlate strongly with  
28  
29 sperm counts.<sup>18</sup> We have no explanation for the higher total testosterone in men from Ka-  
30  
31 wasaki and Osaka compared to other centres. It is important to keep in mind that the ad-  
32  
33 justed hormone levels in Table 3 were adjusted for the effect of BMI, which thus does not  
34  
35 explain the findings.

36  
37 Diagnostic accuracy of varicocele is very dependent on the clinical experience of the  
38  
39 investigator. The high frequency of varicocele may reflect this, since the majority of the  
40  
41 cases were grade 1. We saw no significant negative effect on semen quality, which howev-  
42  
43 er, is likely due to the low grade in most varicoceles.

44  
45 In the European studies semen volume was assessed by weighing which now is the  
46  
47 “gold standard”, because aspiration – as used in our study – underestimates the volume by  
48  
49 approximately 0.4 mL.<sup>19 20</sup> Thus, the true median semen volume might have been 3.4 mL,  
50  
51 which is closer to the volumes reported from Finland, Denmark, Germany, and Spain,<sup>3 7 8</sup>  
52  
53 and thus the adjusted median total sperm count in our study would have been 200 million  
54  
55 rather than 177. Inter-observer variation may explain the higher semen volume detected in  
56  
57 men from Kanazawa compared to other centres, because volume measurements were not  
58  
59 under external quality control.  
60

1  
2  
3  
4  
5  
6 Three Chinese studies have described semen qualities in apparently normal men.  
7 Healthy men, 20-60 years of age, had a median sperm concentration and total sperm count  
8 of approximately 65 million/mL and 154 million, respectively<sup>21</sup>. The youngest age group,  
9 20-25 years old, comprised only 6.1% of the study population, and overall 83% had previ-  
10 ously fathered a child. Another study investigated 20-40 years old men but excluded those  
11 with known andrological diseases and reported a median sperm concentration and total  
12 sperm count of 78 million/mL and 168 million.<sup>22</sup> Junqing *et al*<sup>23</sup> detected a mean sperm  
13 concentration and total sperm count of 55 million/mL and 124 million, respectively, in 22-30  
14 years old men that underwent a premarital physical examination. Thus, the latter may be  
15 more comparable to ours, since the men presumably had little knowledge of their fertility  
16 potential. These Chinese reference values are clearly lower than the current Japanese fig-  
17 ures, suggesting that there are regional differences in semen quality among Asian men.  
18 Interestingly, Chinese men who had at least a college education had lower sperm counts  
19 than men with a lower educational status.<sup>23</sup> If this were true also for Japanese men, the  
20 difference in semen quality between Japanese and Chinese men would be even greater  
21 than what is evident from the present results.  
22  
23  
24  
25  
26  
27  
28  
29  
30  
31  
32  
33  
34

35 Other studies have shown an adverse effect of maternal smoking during pregnancy  
36 on the son's semen quality.<sup>24-26</sup> However, we did not find such an effect, probably because  
37 the number of smoking mothers was very small.  
38  
39  
40

41 The Japanese men appeared to have higher sperm counts than men from the North-  
42 ern Europe<sup>4 5 7 27-30</sup> but slightly lower than men from Spain.<sup>8</sup> Thus, Japanese men may be  
43 ranked as having better sperm counts than many populations of European young men.  
44 Nevertheless, this does not imply that impaired semen quality is not a problem among  
45 young Japanese men. Nearly 10% had sperm counts below the current WHO reference  
46 levels of 15 million/mL or 39 million<sup>30</sup> rendering them for high risk of reduced fertility in the  
47 future. Nearly one third of men had sperm concentration less than 40 million/mL, indicating  
48 reduced fecundity.<sup>32-35</sup> We are therefore concerned that a significant proportion of the men  
49 may experience problems when they reach the ages when they want to reproduce.<sup>32-35</sup>  
50  
51  
52  
53  
54  
55  
56  
57  
58  
59  
60



1  
2  
3  
4  
5  
6  
7  
8  
9  
10  
11  
12  
13  
14  
15  
16  
17  
18  
19  
20  
21  
22  
23  
24  
25  
26  
27  
28  
29  
30  
31  
32  
33  
34  
35  
36  
37  
38  
39  
40  
41  
42  
43  
44  
45  
46  
47  
48  
49  
50  
51  
52  
53  
54  
55  
56  
57  
58  
59  
60

Our prospectively designed study showed no overall difference between men from the four investigation sites, and the semen results were similar to those previously reported for Finnish men that until now have been considered to have the best semen quality among young men from the Northern Europe. The study cohorts were, however, not completely comparable. The recently detected adverse trends in semen quality and testis cancer incidences among men from Finland suggest underlying environmental causes.<sup>30</sup> Whether the semen quality of Japanese men has changed over the years cannot be answered by our current study, but a large proportion of investigated men were shown to have sub-optimal sperm counts. These results will serve as a reference for future studies on time trends in semen quality in Japan and for comparison with future studies of university students in other countries.

**Table 1:** Physical appearance and self-reported information of young men from four cities in Japan.

|                                               | Entire study population (n=1559) |                      | Kawasaki (n=658) |                      | Osaka (n=300) |                      | Kanazawa (n=300) |                      | Nagasaki (n=301) |                      | p-values             |
|-----------------------------------------------|----------------------------------|----------------------|------------------|----------------------|---------------|----------------------|------------------|----------------------|------------------|----------------------|----------------------|
|                                               | Mean (SD)                        | Median (5-95)        | Mean (SD)        | Median (5-95)        | Mean (SD)     | Median (5-95)        | Mean (SD)        | Median (5-95)        | Mean (SD)        | Median (5-95)        |                      |
| Height (cms)                                  | 172 (6)                          | 172 (163-181)        | 172 (6)          | 172 (163-182)        | 172 (6)       | 172 (163-181)        | 173 (6)          | 173 (163-181)        | 172 (5)          | 171 (163-180)        | 0.01 <sup>A</sup>    |
| Weight (kgs)                                  | 64 (9)                           | 63 (52-79)           | 64 (11)          | 63 (52-80)           | 63 (8)        | 63 (52-77)           | 64 (8)           | 63 (52-80)           | 63 (9)           | 62 (52-82)           | 0.4 <sup>A</sup>     |
| BMI (kg/m2)                                   | 21.4 (2.7)                       | 21.0 (18.2-26.0)     | 21.5 (3.0)       | 21.0 (18.2-26.0)     | 21.2 (2.2)    | 20.9 (18.2-25.4)     | 21.4 (2.4)       | 21.1 (18.4-25.8)     | 21.6 (2.6)       | 21.3 (18.0-26.2)     | 0.2 <sup>A</sup>     |
| Mean of left and right size (ml) <sup>a</sup> | 21 (4)                           | 22 (14-28)           | 22 (4)           | 22 (15-28)           | 22 (5)        | 23 (14-29)           | 21 (4)           | 21 (14-29)           | 20 (4)           | 19 (13-26)           | <0.0001 <sup>A</sup> |
| Age (years) <sup>b</sup>                      | 21.3 (1.6)                       | 21.1 (18.9-24.1)     | 20.8 (1.4)       | 20.7 (18.7-23.4)     | 21.7 (1.6)    | 21.6 (19.3-24.4)     | 21.8 (1.6)       | 21.9 (18.9-24.2)     | 21.3 (1.7)       | 21.2 (18.9-24.2)     | <0.0001 <sup>A</sup> |
| School education (years) <sup>c</sup>         | 15 (2)                           | 15 (12-18)           | 14 (2)           | 14 (12-17)           | 15 (2)        | 15 (12-18)           | 15 (2)           | 15 (12-18)           | 15 (2)           | 15 (12-18)           | <0.0001 <sup>A</sup> |
| Ejaculation abstinence (hours) <sup>d</sup>   | 78 (36)                          | 65 (50-136)          | 76 (32)          | 64 (49-136)          | 77 (35)       | 64 (50-136)          | 82(51)           | 67 (51-138)          | 78 (28)          | 66 (51-136)          | 0.0002 <sup>A</sup>  |
|                                               |                                  | <b>Frequency (%)</b> |                  | <b>Frequency (%)</b> |               | <b>Frequency (%)</b> |                  | <b>Frequency (%)</b> |                  | <b>Frequency (%)</b> |                      |
| Have (had)                                    |                                  |                      |                  |                      |               |                      |                  |                      |                  |                      |                      |
| Crvotorchidism <sup>e</sup>                   |                                  | 8.2                  |                  | 6.9                  |               | 8.3                  |                  | 12.7                 |                  | 6.3                  | 0.02 <sup>B</sup>    |
| Testicular torsion                            |                                  | 0.1                  |                  | 0.2                  |               | 0.0                  |                  | 0.3                  |                  | 0.0                  | 0.5 <sup>B</sup>     |
| Orchitis                                      |                                  | 1.4                  |                  | 1.6                  |               | 1.7                  |                  | 1.0                  |                  | 1.0                  | 0.8 <sup>B</sup>     |
| Varicocele                                    |                                  | 0.1                  |                  | 0.0                  |               | 0.3                  |                  | 0.3                  |                  | 0.0                  | 0.2 <sup>B</sup>     |
| Inguinal hernia                               |                                  | 1.1                  |                  | 0.7                  |               | 2.3                  |                  | 1.0                  |                  | 1.0                  | 0.2 <sup>B</sup>     |
| STD <sup>f</sup>                              |                                  | 2.1                  |                  | 2.8                  |               | 1.0                  |                  | 1.3                  |                  | 2.3                  | 0.3 <sup>B</sup>     |
| Thyroid disease or diabetes                   |                                  | 0.1                  |                  | 0.2                  |               | 0.3                  |                  | 0.0                  |                  | 0.0                  | 0.7 <sup>B</sup>     |
| Taken medicine <sup>g</sup>                   |                                  | 10.4                 |                  | 13.7                 |               | 8.0                  |                  | 8.7                  |                  | 7.3                  | 0.0006 <sup>B</sup>  |
| Caused pregnancy                              |                                  | 3.8                  |                  | 4.4                  |               | 2.7                  |                  | 3.3                  |                  | 4.0                  | 0.6 <sup>B</sup>     |
| Experienced fertility problem <sup>h</sup>    |                                  | 0.9                  |                  | 1.8                  |               | 0.3                  |                  | 0.0                  |                  | 0.7                  | 0.03 <sup>B</sup>    |
| Varicocele diagnosed in studv <sup>i</sup>    |                                  | 27.1                 |                  | 26.8                 |               | 24.3                 |                  | 20.0                 |                  | 37.5                 | <0.0001 <sup>B</sup> |
| Tobacco smoker                                |                                  | 49.6                 |                  | 62.4                 |               | 34.6                 |                  | 42.8                 |                  | 45.0                 | <0.0001 <sup>B</sup> |
| Exposed to tobacco in utero <sup>j</sup>      |                                  | 2.0                  |                  | 2.5                  |               | 1.3                  |                  | 1.3                  |                  | 2.3                  | 0.6 <sup>B</sup>     |

**SD:** Standard deviation.  
**(5-95):** 5-95th percentile.

**a:** Size assessed by palpation. Two men had non-palpable left testicles, one from Kawasaki and one from Kanazawa due to previous orchidectomy because of testicular torsion.

**b:** Age calculated as difference between day of attendance in study and self-reported day of birth.

**c:** All participants were university students.

**d:** Ejaculation abstinence period calculated as difference between time of current ejaculation and self-reported time of previous ejaculation.

**e:** Not born with both testicles in scrotum (irrespective of spontaneous descend or treatment).

**f:** Diagnosed with epididymitis, chlamydia or gonorrhoea.

**g:** Taken any medication recent 3 months prior to participation in study. For 93%, 61%, 61% and 60% from Kawasaki, Osaka, Kanazawa and Nagasaki, respectively it was against either infection, allergy or pain.

**h:** Have had unprotected intercourse without causing a pregnancy during a 12 months period.

**i:** Varicocele diagnosed during this study, irrespective of previous self-reported information.

**j:** In utero exposed to maternal tobacco smoking.

**A:** Kruskal-Wallis test

**B:** Fisher's exact test

**Table 2:** Semen quality of young men from four cities in Japan.

|                                                           | Observed   |               | Adjusted         |
|-----------------------------------------------------------|------------|---------------|------------------|
|                                                           | Mean (SD)  | Median (5-95) | Median (95%CI)   |
| <b>Semen volume (ml)</b>                                  |            |               |                  |
| Entire study population                                   | 2.9 (1.4)  | 2.7 (1.0-5.5) | 3.0 (2.8-3.2)    |
| Kawasaki                                                  | 2.7 (1.3)  | 2.5 (0.9-5.2) | 2.8 (2.7-3.2)    |
| Osaka                                                     | 2.9 (1.4)  | 2.7 (1.0-5.6) | 2.9 (2.7-3.2)    |
| Kanazawa                                                  | 3.3 (1.5)  | 3.0 (1.2-6.4) | 3.3 (3.1-3.6)    |
| Nagasaki                                                  | 2.9 (1.4)  | 2.8 (0.9-5.4) | 3.0 (2.8-3.2)    |
| p-value                                                   |            |               | p=0.0006         |
| <b>Sperm concentration (mill/ml)</b>                      |            |               |                  |
| Entire study population                                   | 73 (58)    | 59 (10-185)   | 59 (52-68)       |
| Kawasaki                                                  | 71 (61)    | 55 (9-185)    | 57 (48-66)       |
| Osaka                                                     | 75 (61)    | 60 (9-195)    | 61 (50-74)       |
| Kanazawa                                                  | 72 (55)    | 60 (7-183)    | 61 (51-73)       |
| Nagasaki                                                  | 76 (54)    | 64 (12-181)   | 61 (51-74)       |
| p-value                                                   |            |               | p=0.138          |
| <b>Total sperm count (mill)</b>                           |            |               |                  |
| Entire study population                                   | 201 (183)  | 159 (18-509)  | 177 (153-206)    |
| Kawasaki                                                  | 185 (193)  | 143 (17-472)  | 161 (135-191)    |
| Osaka                                                     | 202 (178)  | 163 (28-508)  | 179 (146-221)    |
| Kanazawa                                                  | 228 (184)  | 185 (15-546)  | 201 (165-246)    |
| Nagasaki                                                  | 201 (161)  | 166 (22-531)  | 183 (150-224)    |
| p-value                                                   |            |               | p=0.002          |
| <b>Motile spermatozoa (%)</b>                             |            |               |                  |
| Entire study population                                   | 67 (14)    | 69 (42-88)    | 67 (65-69)       |
| Kawasaki                                                  | 66 (14)    | 68 (40-87)    | 65 (62-67)       |
| Osaka                                                     | 67 (12)    | 67 (52-84)    | 64 (61-67)       |
| Kanazawa                                                  | 62 (14)    | 64 (38-82)    | 60 (57-63)       |
| Nagasaki                                                  | 76 (14)    | 78 (48-93)    | 75 (73-78)       |
| p-value                                                   |            |               | p<0.0001         |
| <b>Morphologically normal spermatozoa (%)<sup>a</sup></b> |            |               |                  |
| Entire study population                                   | 10.3 (6.0) | 9 (2.5-21.5)  | 9.9 (8.8-10.9)   |
| Kawasaki                                                  | 10.5 (6.2) | 9 (2.5-23)    | 9.3 (7.9-10.6)   |
| Osaka                                                     | 9.2 (5.2)  | 8.5 (2.5-19)  | 8.5 (7.2-9.8)    |
| Kanazawa                                                  | 10.0 (6.1) | 8.8 (2-21)    | 9.3 (8.0-10.5)   |
| Nagasaki                                                  | 11.7 (6.1) | 11 (3-23)     | 11.2 (10.0-12.4) |
| p-value                                                   |            |               | p<0.0001         |

**Observed:** Results based on raw data.

**SD:** Standard deviation.

**(5-95):** 5-95th percentile.

**Adjusted median and 95%CI** (confidence interval) calculated by linear regression analysis.

Semen volume, sperm concentration and total sperm counts adjusted to a period of ejaculation abstinence of 96 h for a 21 years-old-man

Motility and morphology adjusted for a 21 years-old-man, winter season

See text for further explanation.

**p-value:** Based on regression analyses of cubic root transformed values, comparing all four groups.

**a:** Morphology results only available for 869 men.

**Table 3:** Reproductive hormone levels of young men from four cities in Japan

|                                  | Observed  |                | Adjusted       |
|----------------------------------|-----------|----------------|----------------|
|                                  | Mean (SD) | Median (5-95)  | Median (95%CI) |
| <b>FSH (U/l)</b>                 |           |                |                |
| Entire study population          | 2.5 (1.3) | 2.2 (1.1-4.9)  | 2.3 (2.2-2.5)  |
| Kawasaki                         | 2.7 (1.3) | 2.4 (1.1-5.2)  | 2.4 (2.3-2.6)  |
| Osaka                            | 2.5 (1.3) | 2.2 (1.1-5.0)  | 2.3 (2.1-2.4)  |
| Kanazawa                         | 2.3 (1.3) | 2.1 (1-4.4)    | 2.1 (1.9-2.3)  |
| Nagasaki                         | 2.3 (1.2) | 2.1 (0.9-4.4)  | 2.1 (1.9-2.2)  |
| p-value                          |           |                | p<0.0001       |
| <b>Inhibin-B (pg/ml)</b>         |           |                |                |
| Entire study population          | 202 (64)  | 197 (110-314)  | 190 (181-199)  |
| Kawasaki                         | 207 (64)  | 202 (113-322)  | 191 (181-201)  |
| Osaka                            | 214 (67)  | 210 (117-336)  | 193 (182-205)  |
| Kanazawa                         | 191 (62)  | 190 (104-304)  | 177 (164-191)  |
| Nagasaki                         | 188 (60)  | 182 (103-286)  | 176 (165-187)  |
| p-value                          |           |                | p=0.003        |
| <b>LH (U/l)</b>                  |           |                |                |
| Entire study population          | 3.2 (1.3) | 2.9 (1.5-5.6)  | 2.7 (2.6-2.9)  |
| Kawasaki                         | 3 (1.3)   | 2.8 (1.4-5.3)  | 2.7 (2.5-2.8)  |
| Osaka                            | 3.5 (1.4) | 3.2 (1.8-6.4)  | 3.0 (2.9-3.2)  |
| Kanazawa                         | 3.3 (1.4) | 3.1 (1.6-5.8)  | 2.8 (2.6-3.1)  |
| Nagasaki                         | 2.9 (1.0) | 2.8 (1.5-4.9)  | 2.6 (2.4-2.8)  |
| p-value                          |           |                | p<0.0001       |
| <b>Testosterone (nmol/l)</b>     |           |                |                |
| Entire study population          | 25 (8)    | 24 (14-39)     | 26 (25-27)     |
| Kawasaki                         | 26 (7)    | 25 (15-39)     | 26 (25-27)     |
| Osaka                            | 27 (9)    | 26 (15-42)     | 27 (26-28)     |
| Kanazawa                         | 22 (7)    | 21 (12-35)     | 23 (21-24)     |
| Nagasaki                         | 22 (7)    | 21 (13-36)     | 23 (21-24)     |
| p-value                          |           |                | p<0.0001       |
| <b>SHBG (nmol/l)</b>             |           |                |                |
| Entire study population          | 28 (11)   | 26 (13-46)     | 27 (26-28)     |
| Kawasaki                         | 30 (11)   | 29 (14-49)     | 28 (27-30)     |
| Osaka                            | 29 (11)   | 27 (14-50)     | 26 (25-28)     |
| Kanazawa                         | 24 (9)    | 23 (12-41)     | 23 (21-24)     |
| Nagasaki                         | 24 (9)    | 23 (12-42)     | 23 (21-24)     |
| p-value                          |           |                | p<0.0001       |
| <b>cFT (pmol/l) <sup>a</sup></b> |           |                |                |
| Entire study population          | 607 (192) | 585 (326-949)  | 638 (613-663)  |
| Kawasaki                         | 619 (181) | 605 (339-924)  | 630 (604-657)  |
| Osaka                            | 672 (214) | 649 (371-1029) | 675 (642-710)  |
| Kanazawa                         | 556 (183) | 527 (298-894)  | 589 (552-628)  |
| Nagasaki                         | 566 (177) | 550 (316-922)  | 583 (552-615)  |
| p-value                          |           |                | p<0.0001       |

**Observed:** Results based on raw data.

**SD:** Standard deviation.

**(5-95):** 5-95th percentile.

**Adjusted median and 95%CI** (confidence interval) calculated by linear regression analysis, adjusted to blood sampling at 10:00 am in winter season, representing of 21 years-old man having a BMI of 21.

**p-value:** Based on regression analyses of natural logarithmic transformed values, comparing all four groups.

**a:** Calculated free-testosterone.

## Ethics

This study got the approval of the Ethics Review Board in each university and hospital. All participants gave their written consent before participating in the study.

## Acknowledgements

Drs. K. Nishimura, H. Miura, M. Yamanaka are acknowledged for performing physical examinations of the young men. Ms K. Ohata, M. Haruki, and M. Okayama are acknowledged for coordinating the recruitment of the young men. Ms M. Nakanome, S. Okabe, K. Takakura, and Y. Kawabuchi are acknowledged for examination of semen quality. And all other technicians and study nurses of the four centres are acknowledged for coordinating the recruitment and for examination of semen quality. All the volunteers participating in the study are thanked. Without their participation the study would not have been possible.

## Funding

This study has been supported economically by several grants: The Ministry of Health and Welfare, Japan (Grant nos. H10-Seikatsu-017 and H13-Seikatsu-014 to TI, AO, MN, and JE). Japan Society for the Promotion of Science (nos. 1113001 and 1214001 to TI) and The JSPS Invitation Fellowship Programme (invited scientist from Denmark, NJ) by Japan Society for the Promotion of Science (ID no. S10110), Rigshospitalet (Grant no. 961506336) to NJ, Academy of Finland, Sigrid Juselius Foundation and Turku University Hospital to JT. The funding organisations played no role in the design and conduct of the study, in collection, management, analysis, and interpretation of the data; or in the presentation, review, or approval of the manuscript.

### Data sharing statement

There is no additional data available.

### Contributor statement

NJ, NES, JT, SN, MNM, MY and TI conceived and designed this study.

Acquisition of data: TI, MY, SN, KY, KB, MN, EK, JK, AO, KM, AT, HK, and JE.

Data analysis was performed by MNM, NJ and TI.

NJ, TI, SN and JT drafted the manuscript.

MV assessed the sperm morphology smears.

JK, EK, MN, KB, KY, AT, KM, AO, JE, HK and TI performed the physical examinations and collected the data.

All authors participated in the interpretation of data.

- Revising the article critically for important intellectual content: All authors.
- Final approval of the version to be published: All authors.

### References

1. Fisch H, Goluboff ET, Olson JH, *et al.* Semen analysis in 1283 men from the United States over a 25-year period: no decline in quality. *Fertil Steril* 1996;**65**:1009-1414.
2. Vierula M, Niemi M, Keiski A, *et al.* High and unchanged sperm counts of Finnish men. *Int J Androl* 1996;**19**:11-7.
3. Jørgensen N, Andersen AG, Eustache F, *et al.* Regional differences in semen quality in Europe. *Hum Reprod* 2001;**16**:1012-9.
4. Jørgensen N, Carlsen E, Nermoen I, *et al.* East-West gradient in semen quality in the Nordic-Baltic area: a study of men from the general population in Denmark, Norway, Estonia and Finland. *Hum Reprod* 2002;**17**:2199-208.

- 1  
2  
3  
4  
5  
6  
7  
8  
9  
10  
11  
12  
13  
14  
15  
16  
17  
18  
19  
20  
21  
22  
23  
24  
25  
26  
27  
28  
29  
30  
31  
32  
33  
34  
35  
36  
37  
38  
39  
40  
41  
42  
43  
44  
45  
46  
47  
48  
49  
50  
51  
52  
53  
54  
55  
56  
57  
58  
59  
60
5. Punab M, Zilaitiene B, Jørgensen N, *et al.* Regional differences in semen qualities in the Baltic region. *Int J Androl* 2002;**25**:243-52
6. Swan SH, Brazil C, Drobinis EZ *et al.* Geographic differences in semen quality of fertile US males. *Environ Health Perspect* 2003;111:414-420.
7. Paasch U, Salzbrunn A, Glander HJ, *et al.* Semen quality in sub-fertile range for a significant proportion of young men from the general German population: a co-ordinated, controlled study of 791 men from Hamburg and Leipzig. *Int J Androl* 2008;**31**:93-102.
8. Fernandez MF, Duran I, Olea N, *et al.* Semen quality and reproductive hormone levels in men from southern Spain. *Int J Androl* 2012;**35**:1-10
9. Adami HO, Bergström R, Möhner M, *et al.* Testicular cancer in nine northern European countries. *Int J Cancer* 1994;**59**:33-8.
10. Itoh N, Kayama F, Tatsuki TJ, *et al.* Have sperm counts deteriorated over the past 20 years in healthy, young Japanese men? Results from the Sapporo area. *J Androl* 2001;**22**:40-4.
11. World Health Organization. Laboratory manual for examination of human semen and sperm-cervical mucus interaction. 4th edition, Cambridge, UK, Cambridge University Press, 1992.
12. Menkveld R, Stander FS, *et al.* The evaluation of morphological characteristics of human spermatozoa according to stricter criteria. *Hum Reprod* 1990;5:586-92.
13. Vermeulen A, Verdonck L, Kaufman JM. A critical evaluation of simple methods for the estimation of free testosterone in serum. *J Clin Endocrinol Metab* 1999;84:3666-72.
14. Muller A, De La Rochebrochard E, Labbé-Declèves C, *et al.* Selection bias in semen studies due to self-selection of volunteers. *Hum Reprod* 2004;**19**:2838-44.
15. Vital statistics in Japan, Ministry of Health, Labour and Welfare Japan, 2009

16. Jensen TK, Slama R, Ducot B, *et al.* Regional differences in waiting time to pregnancy among fertile couples from four European cities. *Hum Reprod* 2001;**16**:2697-2704.
17. Eustache F, Auger J, Cabrol D, *et al.* Are volunteers delivering semen samples in fertility studies a biased population? *Hum Reprod* 2004;**19**:2831-7.
18. Jørgensen N, Liu F, Andersson AM, *et al.* Serum inhibin-B in fertile men is strongly correlated with low but not high sperm counts: a coordinated study of 1,797 European and US men. *Fertil Steril* 2010;**94**:2128-34.
19. Jørgensen N, Auger J, Giwercman A, *et al.* Semen analysis performed by different laboratory teams: an intervariation study. *Int J Androl* 1997;**20**:201-208.
20. Cooper TG, Brazil C, Swan SH, *et al.* Ejaculate volume is seriously underestimated when semen is pipetted or decanted into cylinders from the collection vessel. *J Androl* 2007;**28**:1-4.
21. Gao J, Gao ES, Yang Q, *et al.* Semen quality in a residential, geographic and age representative sample of healthy Chinese men. *Hum Reprod* 2007;**22**:477-484.
22. Li Y, Lin H, Ma M, *et al.* Semen quality of 1346 healthy men, results from the Chongqing area of southwest China. *Hum Reprod* 2009;**24**:459-469.
23. Junqing W, Qiuying Y, Jianguo T, *et al.* Reference value of semen quality in Chinese young men. *Contraception* 2002;**65**:365-368.
24. Storgaard L, Bonde JP, Ernst E, *et al.* Does smoking pregnancy affect son's sperm count?. *Epidemiology* 2003;**14**:278-86
25. Jensen TK, Jørgensen N, Punab M, *et al.* Association of in utero exposure to maternal smoking with reduced semen quality and testis size in adulthood: a cross-sectional study of 1,770 young men from the general population in five European countries. *Am J Epidemiol* 2004;**159**:49-58.



- 1  
2  
3  
4  
5  
6 26. Ranvborg TL, Jensen TK, Andersen AM, *et al.* Prenatal and adult exposures to smoking  
7 are associated with adverse effects on reproductive hormones, semen quality, final  
8 height and body mass index. *Hum Reorod* 2011;**26**:1000-11.  
9  
10  
11  
12 27. Jørgensen N, Ask Lund C, Carlsen E, *et al.* Coordinated European investigations of  
13 semen quality: Results from studies of Scandinavian young men is a matter of concern.  
14  
15 *Int J Androl* 2006;**29**:54-61..  
16  
17  
18 28. Axelsson J, Rylander L, Ringnell-Hybdom A, *et al.* No secular trend over the last dec-  
19 ade in sperm counts among Swedish men from general population. *Hum Reprod*  
20  
21 2011;**26**:1012-16  
22  
23  
24 29. Tsarev I, Gagonin V, Giwercman A, *et al.* Sperm concentration in Latvian military con-  
25 scription as compared with other countries in the Nordic-Baltic area. *Int J Androl*  
26  
27 2005;**28**:208-214.  
28  
29  
30 30. Jørgensen N, Vierula M, Jacobsen R, *et al.* Recent adverse trends in semen quality and  
31 testis cancer incidence among Finnish men. *Int J Androl* 2011;**34**:e37-48.  
32  
33  
34 31. World Health Organisation. WHO Laboratory Manual for the Examination and Pro-  
35 cessing of Human Semen. 5<sup>th</sup> edn. 2010.  
36  
37 [http://whqlibdoc.who.int/publications/2010/9789241547789\\_eng.pdf](http://whqlibdoc.who.int/publications/2010/9789241547789_eng.pdf)  
38  
39  
40 32. Bonde JP, Ernst E, Jensen TK, *et al.* Relation between semen quality and fertility: a  
41 population-based study of 430 first-pregnancy planners. *Lancet* 1998;**352**:1172-7.  
42  
43  
44 33. Guzick DS, Overstreet JW, Factor-Litvak P, *et al.* Sperm morphology, motility, and  
45 concentration in fertile and infertile men. *N Engl J Med* 2001;**345**:1388-93.  
46  
47  
48 34. Slama R, Eustache F, Ducot B, *et al.* Time to pregnancy and semen parameters: a  
49 cross-sectional study among fertile couples from four European cities. *Hum Reprod*  
50  
51 2002;**17**:503-15.  
52  
53  
54  
55  
56  
57  
58  
59  
60

1  
2  
3  
4  
5  
6  
7  
8  
9  
10  
11  
12  
13  
14  
15  
16  
17  
18  
19  
20  
21  
22  
23  
24  
25  
26  
27  
28  
29  
30  
31  
32  
33  
34  
35  
36  
37  
38  
39  
40  
41  
42  
43  
44  
45  
46  
47  
48  
49  
50  
51  
52  
53  
54  
55  
56  
57  
58  
59  
60

35. Jedrzejczak P, Taszarek-Hauke G, Hauke J, *et al.* Prediction of spontaneous conception based on semen parameters. *Int J Androl* 2008;**31**:499-507.

For peer review only

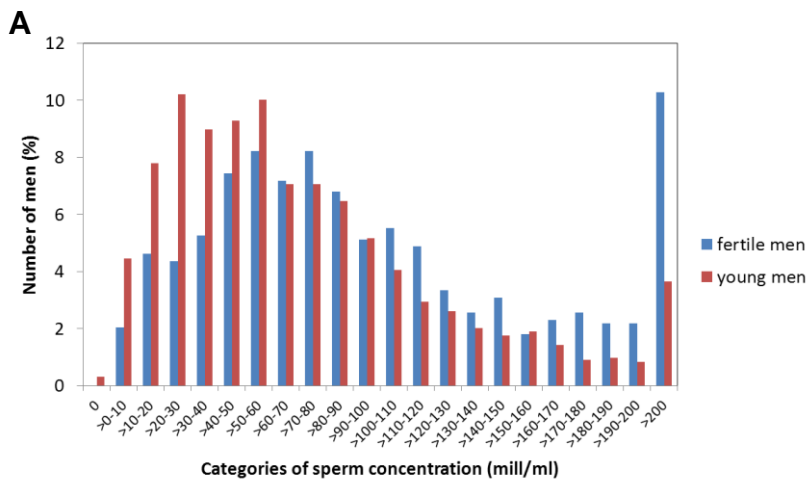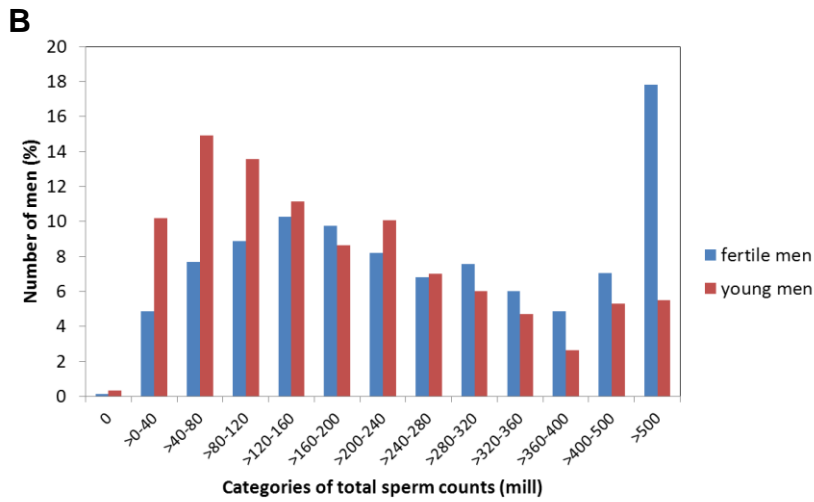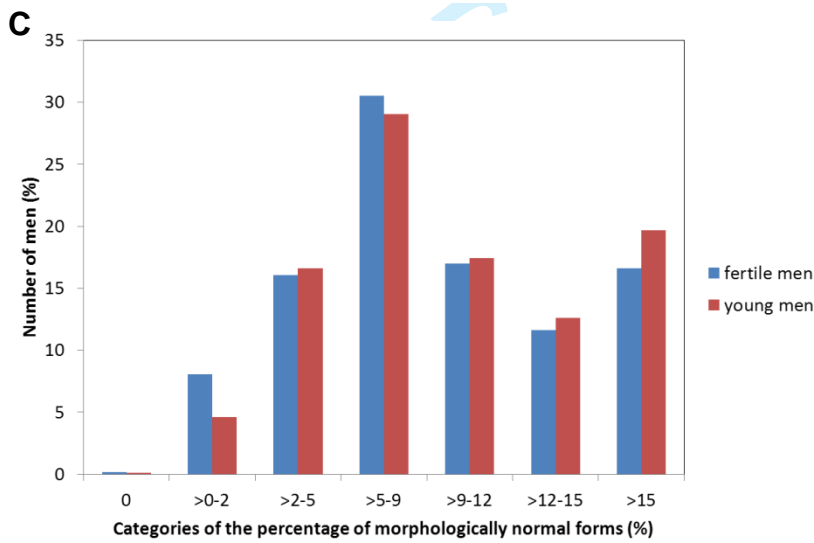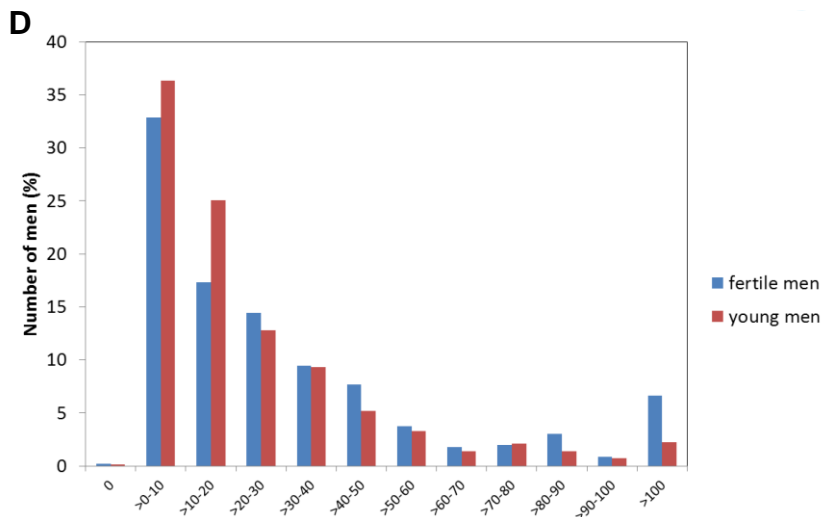

1  
2  
3  
4  
5  
6  
7  
8  
9  
10  
11  
12  
13  
14  
15  
16  
17  
18  
19  
20  
21  
22  
23  
24  
25  
26  
27  
28  
29  
30  
31  
32  
33  
34  
35  
36  
37  
38  
39  
40  
41  
42  
43  
44  
45  
46  
47  
48  
49  
50  
51  
52  
53  
54  
55  
56  
57  
58  
59  
60

STROBE 2007 (v4) Statement—Checklist of items that should be included in reports of *cross-sectional studies*

| Section/Topic                | Item # | Recommendation                                                                                                                                                                       | Reported on page # |
|------------------------------|--------|--------------------------------------------------------------------------------------------------------------------------------------------------------------------------------------|--------------------|
| Title and abstract           | 1      | (a) Indicate the study's design with a commonly used term in the title or the abstract                                                                                               | 1, 4               |
|                              |        | (b) Provide in the abstract an informative and balanced summary of what was done and what was found                                                                                  | 3, 4               |
| <b>Introduction</b>          |        |                                                                                                                                                                                      |                    |
| Background/rationale         | 2      | Explain the scientific background and rationale for the investigation being reported                                                                                                 | 3-5                |
| Objectives                   | 3      | State specific objectives, including any prespecified hypotheses                                                                                                                     | 4, 5               |
| <b>Methods</b>               |        |                                                                                                                                                                                      |                    |
| Study design                 | 4      | Present key elements of study design early in the paper                                                                                                                              | 4, 5               |
| Setting                      | 5      | Describe the setting, locations, and relevant dates, including periods of recruitment, exposure, follow-up, and data collection                                                      | 5, 6               |
| Participants                 | 6      | (a) Give the eligibility criteria, and the sources and methods of selection of participants                                                                                          | 5, 6               |
| Variables                    | 7      | Clearly define all outcomes, exposures, predictors, potential confounders, and effect modifiers. Give diagnostic criteria, if applicable                                             | 3, 7, 8            |
| Data sources/<br>measurement | 8*     | For each variable of interest, give sources of data and details of methods of assessment (measurement). Describe comparability of assessment methods if there is more than one group | 6-8                |
| Bias                         | 9      | Describe any efforts to address potential sources of bias                                                                                                                            | 8, 9               |
| Study size                   | 10     | Explain how the study size was arrived at                                                                                                                                            | 6                  |
| Quantitative variables       | 11     | Explain how quantitative variables were handled in the analyses. If applicable, describe which groupings were chosen and why                                                         | 7-10               |
| Statistical methods          | 12     | (a) Describe all statistical methods, including those used to control for confounding                                                                                                | 8-10               |
|                              |        | (b) Describe any methods used to examine subgroups and interactions                                                                                                                  | 8, 9               |
|                              |        | (c) Explain how missing data were addressed                                                                                                                                          | N/A                |
|                              |        | (d) If applicable, describe analytical methods taking account of sampling strategy                                                                                                   | 5, 6               |
|                              |        | (e) Describe any sensitivity analyses                                                                                                                                                | 7                  |
| <b>Results</b>               |        |                                                                                                                                                                                      |                    |

|                          |     |                                                                                                                                                                                                                                                                                                                                                                                                               |                               |
|--------------------------|-----|---------------------------------------------------------------------------------------------------------------------------------------------------------------------------------------------------------------------------------------------------------------------------------------------------------------------------------------------------------------------------------------------------------------|-------------------------------|
| Participants             | 13* | (a) Report numbers of individuals at each stage of study—eg numbers potentially eligible, examined for eligibility, confirmed eligible, included in the study, completing follow-up, and analysed<br>(b) Give reasons for non-participation at each stage<br>(c) Consider use of a flow diagram                                                                                                               | 5, 6                          |
| Descriptive data         | 14* | (a) Give characteristics of study participants (eg demographic, clinical, social) and information on exposures and potential confounders<br>(b) Indicate number of participants with missing data for each variable of interest                                                                                                                                                                               | 6, 16 (Table 1)               |
| Outcome data             | 15* | Report numbers of outcome events or summary measures                                                                                                                                                                                                                                                                                                                                                          | 10-12, 17, 18 (Table 2 and 3) |
| Main results             | 16  | (a) Give unadjusted estimates and, if applicable, confounder-adjusted estimates and their precision (eg, 95% confidence interval). Make clear which confounders were adjusted for and why they were included<br>(b) Report category boundaries when continuous variables were categorized<br>(c) If relevant, consider translating estimates of relative risk into absolute risk for a meaningful time period | 10-12, 17, 18 (Table 2 and 3) |
| Other analyses           | 17  | Report other analyses done—eg analyses of subgroups and interactions, and sensitivity analyses                                                                                                                                                                                                                                                                                                                |                               |
| <b>Discussion</b>        |     |                                                                                                                                                                                                                                                                                                                                                                                                               |                               |
| Key results              | 18  | Summarise key results with reference to study objectives                                                                                                                                                                                                                                                                                                                                                      | 3, 4, 12                      |
| Limitations              | 19  | Discuss limitations of the study, taking into account sources of potential bias or imprecision. Discuss both direction and magnitude of any potential bias                                                                                                                                                                                                                                                    | 12-15                         |
| Interpretation           | 20  | Give a cautious overall interpretation of results considering objectives, limitations, multiplicity of analyses, results from similar studies, and other relevant evidence                                                                                                                                                                                                                                    | 14, 15                        |
| Generalisability         | 21  | Discuss the generalisability (external validity) of the study results                                                                                                                                                                                                                                                                                                                                         | 15                            |
| <b>Other information</b> |     |                                                                                                                                                                                                                                                                                                                                                                                                               |                               |
| Funding                  | 22  | Give the source of funding and the role of the funders for the present study and, if applicable, for the original study on which the present article is based                                                                                                                                                                                                                                                 | 19                            |

\*Give information separately for cases and controls in case-control studies and, if applicable, for exposed and unexposed groups in cohort and cross-sectional studies.

**Note:** An Explanation and Elaboration article discusses each checklist item and gives methodological background and published examples of transparent reporting. The STROBE checklist is best used in conjunction with this article (freely available on the Web sites of PLoS Medicine at <http://www.plosmedicine.org/>, Annals of Internal Medicine at <http://www.annals.org/>, and Epidemiology at <http://www.epidem.com/>). Information on the STROBE Initiative is available at [www.strobe-statement.org](http://www.strobe-statement.org).



## Semen quality of 1,559 young men from four cities in Japan

|                                 |                                                                                                                                                                                                                                                                                                                                                                                                                                                                                                                                                                                                                                                                                                                                                                                                                                                                                                                                                                                                                                                                                                                                                                                                                                                                                                                                                                                                                                                                                                                                                                                                                                                                                                                                                                                                                                                                                                                                                                |
|---------------------------------|----------------------------------------------------------------------------------------------------------------------------------------------------------------------------------------------------------------------------------------------------------------------------------------------------------------------------------------------------------------------------------------------------------------------------------------------------------------------------------------------------------------------------------------------------------------------------------------------------------------------------------------------------------------------------------------------------------------------------------------------------------------------------------------------------------------------------------------------------------------------------------------------------------------------------------------------------------------------------------------------------------------------------------------------------------------------------------------------------------------------------------------------------------------------------------------------------------------------------------------------------------------------------------------------------------------------------------------------------------------------------------------------------------------------------------------------------------------------------------------------------------------------------------------------------------------------------------------------------------------------------------------------------------------------------------------------------------------------------------------------------------------------------------------------------------------------------------------------------------------------------------------------------------------------------------------------------------------|
| Journal:                        | <i>BMJ Open</i>                                                                                                                                                                                                                                                                                                                                                                                                                                                                                                                                                                                                                                                                                                                                                                                                                                                                                                                                                                                                                                                                                                                                                                                                                                                                                                                                                                                                                                                                                                                                                                                                                                                                                                                                                                                                                                                                                                                                                |
| Manuscript ID:                  | bmjopen-2012-002222.R1                                                                                                                                                                                                                                                                                                                                                                                                                                                                                                                                                                                                                                                                                                                                                                                                                                                                                                                                                                                                                                                                                                                                                                                                                                                                                                                                                                                                                                                                                                                                                                                                                                                                                                                                                                                                                                                                                                                                         |
| Article Type:                   | Research                                                                                                                                                                                                                                                                                                                                                                                                                                                                                                                                                                                                                                                                                                                                                                                                                                                                                                                                                                                                                                                                                                                                                                                                                                                                                                                                                                                                                                                                                                                                                                                                                                                                                                                                                                                                                                                                                                                                                       |
| Date Submitted by the Author:   | 21-Feb-2013                                                                                                                                                                                                                                                                                                                                                                                                                                                                                                                                                                                                                                                                                                                                                                                                                                                                                                                                                                                                                                                                                                                                                                                                                                                                                                                                                                                                                                                                                                                                                                                                                                                                                                                                                                                                                                                                                                                                                    |
| Complete List of Authors:       | <p>Iwamoto, Teruaki; International University of Health and Welfare Hospital, Division of Male Infertility, Centre for Infertility and IVF<br/>         Nozawa, Shiari; St. Marianna University School of Medicine, Department of Urology<br/>         Naka-Mieno, Makiko; Jichi Medical University, Department of Medical Informatics, Center of Information<br/>         Yamakawa, Katsunori; St. Marianna University School of Medicine, Department of Urology<br/>         Baba, Katsuyuki; St. Marianna University School of Medicine, Department of Urology<br/>         Yoshiike, Miki; St. Marianna University School of Medicine, Department of Urology<br/>         Namiki, Mikio; Kanazawa University Graduate School of Medical Science, Department of Urology<br/>         Koh, Eitetsu; Kanazawa University Graduate School of Medical Science, Department of Urology<br/>         Kanaya, Jiro; Kanazawa University Graduate School of Medical Science, Department of Urology<br/>         Okuyama, Akihiko; Osaka University Graduate School of Medicine, Department of Urology<br/>         Matsumiya, Kiyomi; Osaka University Graduate School of Medicine, Department of Urology<br/>         Tsujimura, Akira; Osaka University Graduate School of Medicine, Department of Urology<br/>         Kanetake, Hiroshi; Nagasaki University, Department of Urology<br/>         Eguchi, Jiro; Nagasaki University, Department of Urology<br/>         Skakkebaek, Niels; University of Copenhagen, University Department of Growth and Reproduction, Rigshospitalet, Faculty of Health Sciences<br/>         Vierula, Matti; University of Turku, Department of Physiology and Paediatrics<br/>         Toppari, Jorma; University of Turku, Department of Physiology and Paediatrics<br/>         Jørgensen, Niels; University of Copenhagen, University Department of Growth and Reproduction, Rigshospitalet, Faculty of Health Sciences</p> |
| <b>Primary Subject Heading</b>: | Epidemiology                                                                                                                                                                                                                                                                                                                                                                                                                                                                                                                                                                                                                                                                                                                                                                                                                                                                                                                                                                                                                                                                                                                                                                                                                                                                                                                                                                                                                                                                                                                                                                                                                                                                                                                                                                                                                                                                                                                                                   |
| Secondary Subject Heading:      | Reproductive medicine, Epidemiology, Diabetes and endocrinology, Public health                                                                                                                                                                                                                                                                                                                                                                                                                                                                                                                                                                                                                                                                                                                                                                                                                                                                                                                                                                                                                                                                                                                                                                                                                                                                                                                                                                                                                                                                                                                                                                                                                                                                                                                                                                                                                                                                                 |
| Keywords:                       | semen quality, reproductive hormones, young men, REPRODUCTIVE MEDICINE, Adult urology < UROLOGY                                                                                                                                                                                                                                                                                                                                                                                                                                                                                                                                                                                                                                                                                                                                                                                                                                                                                                                                                                                                                                                                                                                                                                                                                                                                                                                                                                                                                                                                                                                                                                                                                                                                                                                                                                                                                                                                |

1  
2  
3  
4  
5  
6  
7  
8  
9  
10  
11  
12  
13  
14  
15  
16  
17  
18  
19  
20  
21  
22  
23  
24  
25  
26  
27  
28  
29  
30  
31  
32  
33  
34  
35  
36  
37  
38  
39  
40  
41  
42  
43  
44  
45  
46  
47  
48  
49  
50  
51  
52  
53  
54  
55  
56  
57  
58  
59  
60



SCHOLARONE™  
Manuscripts

For peer review only

**Title:**

Semen quality of 1,559 young men from four cities in Japan

**Study design:**

Cross sectional population-based study

**Authors**

Teruaki Iwamoto<sup>1,2</sup>, Shiari Nozawa<sup>2</sup>, Makiko Naka Mieno<sup>3</sup>, Katsunori Yamakawa<sup>2</sup>, Katsuyuki Baba<sup>2</sup>, Miki Yoshiike<sup>2</sup>, Mikio Namiki<sup>4</sup>, Eitetsu Koh<sup>4</sup>, Jiro Kanaya<sup>4</sup>, Akihiko Okuyama<sup>5</sup>, Kiyomi Matsumiya<sup>5</sup>, Akira Tsujimura<sup>5</sup>, Hiroshi Kanetake<sup>6</sup>, Jiro Eguchi<sup>6</sup>, Niels E. Skakkebaek<sup>7</sup>, Matti Vierula<sup>8</sup>, Jorma Toppari<sup>8</sup>, and Niels Jørgensen<sup>7</sup>

**From:**

<sup>1</sup> Division of Male Infertility, Centre for Infertility and IVF, International University of Health and Welfare Hospital, Nasushiobara, Japan

<sup>2</sup> Department of Urology, St. Marianna University School of Medicine, Kawasaki, Japan

<sup>3</sup> Department of Medical Informatics, Centre for Information, Jichi Medical University, Shimotsuke, Japan

<sup>4</sup> Department of Urology, Kanazawa University Graduate School of Medical Science, Kanazawa, Japan

<sup>5</sup> Department of Urology, Osaka University Graduate School of Medicine, Osaka, Japan

<sup>6</sup> Department of Urology, Nagasaki University, Nagasaki, Japan

<sup>7</sup> University Department of Growth and Reproduction, Rigshospitalet, DK-2100 Copenhagen, Denmark

<sup>8</sup> Departments of Physiology and Paediatrics, University of Turku, FI-20520 Turku, Finland



**Correspondence:**

Professor Teruaki Iwamoto

Division of Male Infertility, Centre for Infertility and IVF, International University of Health and Welfare Hospital, Nasushiobara, 329-2763, Japan

Tel: +81 287 37 2221

Fax: +81 287 39 3001

Email: t4iwa@iuhw.ac.jp

**Key words:**

Semen quality, reproductive hormones, young men

**Word count:**

Abstract: 244

Main text: 3630

**Subject heading:**

Semen quality and reproductive hormones in Japanese young men.

## ARTICLE SUMMARY

### Article focus:

- There has only been one Japanese study reporting semen quality of presumably normal young men indicating good semen quality compared with men from Europe.
- To establish the frequency of impaired semen quality among normal young Japanese men.

### Key messages:

- Semen quality of the young men was significantly poorer than that of partners of pregnant women, and 32% may have reduced fertility chances.
- Semen quality was highly variable.
- These results will serve as a reference for future studies on time trends in semen quality in Japan and for comparison with future studies of university students in other countries.

### Strengths and limitations:

- Large-scale prospective study of semen quality among Japanese young men.
- Standardised inclusion criteria and investigation procedures.
- Lack of influence of ethnicity and genetic background on semen quality.
- Relatively low participation rate limits the possibility to generalize the results for the whole population, which is the common problem for all semen studies

**ABSTRACT**

**Objectives:** To provide information of semen quality among normal young Japanese men and indicate the frequency of reduced semen quality.

**Design:** Cross-sectional, coordinated studies of Japanese young men included from university areas. The men had to be 18 to 24 years, and both the man and his mother had to be born in Japan. Background information was obtained from questionnaires. Standardized and quality controlled semen analyses were performed, reproductive hormones analysed centrally and results adjusted for confounding factors.

**Setting:** Four study centres in Japan (Kawasaki, Osaka, Kanazawa and Nagasaki).

**Participants:** 1,559 men, median age 21.1 years, included during 1999-2003.

**Outcome measures:** Semen volume, sperm concentration, total sperm count, sperm motility, sperm morphology and reproductive hormone levels.

**Results:** Median sperm concentration was 59 (95% confidence interval 52-68) million/mL, and 9.0% and 31.9% had less than 15 and 40 million/mL, respectively. Median percentage of morphologically normal spermatozoa was 9.6 (8.8-10.3) %. Small but statistically significant differences were detected for both semen and reproductive hormone variables between men from the four cities. Overall, the semen values were lower than those of a reference population of 792 fertile Japanese men.

**Conclusions:** Assuming the investigated men were representative for young Japanese men, a significant proportion of the population had suboptimal semen quality with reduced fertility potential, and as a group they had lower semen quality than fertile men. However, the definitive role – if any - of low semen quality for subfertility and low fertility rates remains to be investigated.

## INTRODUCTION

Whether there has been a global decreasing trend in semen quality remains still controversial. In contrast, there is a consensus that regional differences exist.<sup>1-7</sup> Cross-sectional, coordinated studies of young men from the general populations have shown that men from the Western part of the Northern European countries have lower semen quality than men from the Eastern part or men from Southern Spain,<sup>4-8</sup> which is inversely correlated with the testicular cancer incidences.<sup>8,9</sup>

There has only been one Japanese study reporting semen quality of presumably normal young men<sup>10</sup> indicating good semen quality compared with men from Europe. However, the authors concluded that their results might be flawed by a selection bias and lack of ability to account for confounding factors, and they requested well-designed prospective studies to be performed in several regions of Japan.

Here, we present the results of prospectively designed, cross-sectional studies of young university students from four different provinces in Japan. Our objectives were to elucidate if reduced semen quality were frequent among Japanese men unselected for their fertility status, to examine possible regional differences, to provide a reference for future studies on time trends in semen quality, and to compare the results with those obtained in other countries.

## METHODS

The investigations took place at four study centres based in departments of urology at university hospitals in Kawasaki, Osaka, Kanazawa and Nagasaki in Japan. The investigation procedures described below were the same as those of the previously published European studies<sup>4,5,7</sup> except for the selection of study populations and assessment of semen volume.

### Study populations of young men

University students were informed about the study through posters placed in several conspicuous places on the campuses of the universities connected to the four study centres.

1  
2  
3  
4  
5  
6  
7  
8  
9  
10  
11  
12  
13  
14  
15  
16  
17  
18  
19  
20  
21  
22  
23  
24  
25  
26  
27  
28  
29  
30  
31  
32  
33  
34  
35  
36  
37  
38  
39  
40  
41  
42  
43  
44  
45  
46  
47  
48  
49  
50  
51  
52  
53  
54  
55  
56  
57  
58  
59  
60

Serially numbered leaflets giving detailed information about the study were attached to the posters. A candidate volunteer had to call the study centre, inform the serial number printed on his copy of the leaflet to make an appointment for the investigations approximately one week later, and to receive a package of documents within days by mail. The package included further written information, a questionnaire and the instruction to preferably abstain from ejaculation for at least 48 hours prior to producing the semen sample for the study. Further inclusion criteria were that the man was 18-24 years, and that both he and his mother were born in Japan. Failure to comply with the request for ejaculation abstinence period was not a reason for exclusion, but the abstinence time was recorded according to the information given by the study subjects at the time of the semen sample delivery. On the day of attendance that was set at a certain time in the morning, the man returned the completed questionnaire, underwent a physical examination, provided a semen sample and had a blood sample drawn.

The study in Kawasaki covered two separate periods: May 1999 to May 2000 and April 2002 to May 2003, and the study periods in Osaka, Kanazawa, and Nagasaki were September 2002 to October 2003, July 2002 to June 2003, and July 2002 to July 2003, respectively. In total 9,374 leaflets were taken by the students and 1,559 (16.6%) participated; 14.5% (658/4,534) from Kawasaki, 11.7% (300/2,570) from Osaka, 21.9% (300/1,371) from Kanazawa, and 33.3% (301/899) from Nagasaki.

The healthy subgroup (n=1,307) of the entire study population (n=1,559), who had no history of cryptorchidism, testicular torsion, orchitis, varicocele, inguinal hernia, caused pregnancy, and experienced fertility problem, was examined separately (Supplemental Table 1).

### Questionnaires

The questionnaire included information on age and previous or current diseases, including any known history of fertility. To assure the quality of the information regarding previous conditions the men were asked to fill in the questionnaire – if possible – in collaboration with their parents.

### Physical examination

The participants had their testes size measured by use of a Prader orchidometer (Pharmacia & Upjohn, Copenhagen, Denmark). The presence of varicocele or other scrotal abnormalities and the Tanner stage of pubic hair were evaluated. Body weight and height were self-reported, and body mass index (BMI) was calculated as weight in kilograms divided by squared height in meters.

### Semen samples

The ejaculation abstinence period was calculated as the time between the current and previous ejaculation based on self-reported information from the men. Semen samples were collected at the laboratory and kept at 37°C during liquefaction. Semen volume was assessed by aspirating the entire sample into a graduated 5ml syringe (TERUMO, Tokyo). Sperm motility was assessed on 10 µl of well-mixed semen placed on a clean glass slide, covered with a 22x22 mm coverslip, and then examined at a total magnification of 400 times on the heating stage at 37°C of a microscope. The sperm were classified as either motile (WHO motility classes A, B or C) or immotile (class D), in order to record the proportion of motile sperm.<sup>11</sup> The motility assessment was repeated on a second 10 µl aliquot of semen, and the average value of the two samples was calculated. For the assessment of sperm concentration the samples were diluted in a solution of 0.6 mol/L NaHCO<sub>3</sub> and 0.4% (v/v) formaldehyde in distilled water, subsequently assessed using Bürker-Türk haemocytometers. Only sperm with tails were counted. Smears were prepared for morphological evaluation, Papanicolaou stained and finally assessed according to strict criteria<sup>12</sup> by one examiner (MV) in Finland between 2009 and 2010.

### Quality control of sperm concentration assessment

1  
2  
3  
4  
5  
6 Inter-laboratory variation in assessment of sperm concentration was monitored by an external quality control (QC) programme coordinated by the Department of Growth and Reproduction Copenhagen, Denmark<sup>3,4</sup> during the study period.  
7  
8  
9  
10

### 11 12 13 **Blood samples**

14  
15 A blood sample was drawn from a cubital vein of each participant usually in the morning to reduce the effect of diurnal variation in hormone levels, and the serum was separated by centrifugation after clotting and stored at  $-20^{\circ}\text{C}$ . The frozen serum was sent to the Department of Growth and Reproduction, Rigshospitalet, in Copenhagen, Denmark for a centralised hormone analysis. Levels of testosterone, FSH, LH and sex hormone-binding globulin (SHBG) were determined using a time-resolved immunofluorometric assay (Delfia, Wallac, Turku, Finland). Inhibin-B was measured by a specific two-sided enzyme immuno-metric assay (Serotec, UK). Intra- and inter-assay coefficients of variations (CV) for measurements of both FSH and LH were 3% and 4.5%, respectively. CVs for both testosterone and SHBG were <8% and <5%, respectively. The intra- and inter-assay CVs for inhibin-B were 15% and 18%. Free testosterone (cFT) was calculated from total testosterone and SHBG using fixed albumin level of 43.8 g/L as described by Vermeulen.<sup>13</sup>  
16  
17  
18  
19  
20  
21  
22  
23  
24  
25  
26  
27  
28  
29  
30  
31  
32  
33  
34  
35  
36  
37  
38  
39

### 40 **Comparison population: Fertile men (partners of pregnant women)**

41 From January 1999 to February 2002, our group also examined the semen quality of 792 fertile men (partners of pregnant women) (a manuscript describing these have been submitted in parallel). Participation of these men was similar to that of current study population of young men: they answered a questionnaire, delivered a semen sample, and had a physical examination performed. The results of their semen analyses were used for comparison to that of the young men.  
42  
43  
44  
45  
46  
47  
48  
49  
50  
51  
52

### 53 54 55 **Statistical analysis**

1  
2  
3  
4  
5  
6 Standard statistics (mean, median, standard deviation (SD), 5-95 percentiles and frequen-  
7  
8 cies) were used for description (Tables 1-3). Between-group differences for continuous  
9  
10 variables giving the basic description of the study population were tested by the  
11  
12 non-parametric Kruskal-Wallis test. Between-group differences for categorical variables  
13  
14 were tested with the Fisher's exact test.  
15

16  
17 The main outcome variables were the assessed semen and hormone variables,  
18  
19 and the between group differences were tested by multiple linear regression (Tables 2 and  
20  
21 3). Semen volume, sperm concentration and total sperm counts were best normalised by  
22  
23 cubic root transformation before analysis to correct for skewed distribution of residuals. The  
24  
25 percentages of motile spermatozoa were logit-transformed. Percentages of morphologically  
26  
27 normal spermatozoa entered the model untransformed. Ejaculation abstinence up to 96  
28  
29 hours had a linear increasing effect and abstinence above 96 hours a slight, but significant  
30  
31 non-linear increasing effect on semen volume, sperm concentrations and total sperm  
32  
33 counts. Abstinence therefore entered the model as a covariate as linear splines and absti-  
34  
35 nence-squared for the part above 96 hours. For motility, winter season was associated with  
36  
37 lower motility percentages and season was therefore included as a covariate. For all semen  
38  
39 variables increasing age tended to be slightly, but negatively associated with semen varia-  
40  
41 bles and age was also included in the models. Duration from ejaculation to assessment was  
42  
43 additionally evaluated as a confounder for motility, but found to be non-significant, and  
44  
45 therefore not included.

46  
47 Natural logarithmic transformation gave models in which differences between centres  
48  
49 and effects of covariates are more easily interpretable. This alternative model approximate  
50  
51 closely the model obtained by cubic root transformation and is used when reporting adjusted  
52  
53 semen volumes, sperm concentrations and total sperm counts to represent a 21-year-old  
54  
55 man having an ejaculation abstinence period of 96 hours. QC results did not show any sig-  
56  
57 nificant inter-laboratory differences, changes during the study period or difference to the  
58  
59 reference laboratory. Therefore, corrections of data were not needed to make them com-  
60



1  
2  
3  
4  
5  
6 parable. The logit-transformed motility data and untransformed morphology percentages  
7 were used to give adjusted levels for a 21-years-old man for these variables.  
8

9 Differences with  $p < 0.05$  were considered statistically significant. All statistical anal-  
10 yses were done twice: MNM using SAS version 9.1.3 (SAS Institute Inc., Cary, NC, USA)  
11 and NJ using PASW version 18.  
12  
13

## 14 15 16 17 **RESULTS**

18 A description of the study population is summarized in Table 1. Few men had caused a  
19 pregnancy or experienced infertility problems, in total 4.7%. During the preceding 3 months  
20 to participation in the study, 10.4% had used medications which were mainly antibiotics,  
21 painkillers, asthma or allergy medicines.  
22  
23

24 Semen results are shown in Table 2. "Observed" values are based on raw data, and  
25 "Adjusted" are the estimates from regression analyses taking covariates into account.  
26 Sperm concentrations did not differ between men from the four study centres, whereas the  
27 semen volume for men from Kanazawa was higher than in other centres ( $p < 0.0001-0.02$  in  
28 pair-wise comparisons). Consequently, also total sperm counts were higher for these men,  
29 but only significantly in the pair-wise comparison with men from Kawasaki ( $p < 0.02$ ). The  
30 percentages of motile spermatozoa differed significantly, because men from Nagasaki had  
31 higher frequencies of motile spermatozoa than men from other centres (adjusted medians  
32 64-75%). The percentage of morphologically normal spermatozoa for men from Nagasaki  
33 was higher than that from Osaka ( $p < 0.0001$  in pair-wise comparison). These results were  
34 very similar to those from the healthy subgroup of young men ( $n = 1,307$ ; Supplemental Table  
35 1) who had no history of reproductive problems, i.e. cryptorchidism, testicular torsion, orchitis,  
36 varicocele, inguinal hernia, STD, caused pregnancy, and experienced fertility problem.  
37  
38  
39  
40  
41  
42  
43  
44  
45  
46  
47  
48  
49

50 Cumulated, 2.2% of men had a sperm concentration below 5 million/mL, 4.9% below  
51 10 million/mL, 9.0% below 15 million/mL and 31.9% below 40 million/mL. For morphology  
52 5.7% of men had normal spermatozoa below 5%. Figure 1 summarizes the distribution of  
53  
54  
55  
56  
57  
58  
59  
60

1  
2  
3  
4  
5  
6 the sperm concentration, total sperm counts, percentages and total numbers of morpho-  
7 logically normal spermatozoa.  
8

9  
10 Figure 1 summarises the semen results of the young men in comparison to that of  
11 the 792 fertile men. The semen variables differed between these groups, with fertile men  
12 having higher semen volume ( $p<0.002$ ), sperm concentration ( $p<0.0001$ ), total sperm count  
13 ( $p<0.0001$ ), total number of morphologically normal spermatozoa ( $p<0.0001$ ) and the per-  
14 centage of normal spermatozoa ( $p=0.05$ ) than young men.  
15  
16  
17

18  
19 The semen variables of men whose mothers had smoked during pregnancy did not  
20 significantly differ from non-exposed men, but the number of smoking mother was very small.  
21  
22 The men's own smoking or drinking habits (not shown in Table), previous experience of  
23 cryptorchidism, testicular torsion, orchitis, sexually transmitted diseases (chlamydia, gon-  
24 norrhoea or epididymitis) or previous fertility experience did not affect their semen variables.  
25  
26  
27

28  
29 Reproductive hormone levels differed between the groups of young men (Table 3).  
30 Men from Kawasaki and Osaka had slightly higher FSH ( $p<0.0001-0.049$ ) and inhibin-B  
31 ( $p<0.003-0.01$ ) levels than men from Kanazawa and Nagasaki. A similar pattern was seen  
32 for total testosterone (all  $p<0.0001$ ), SHBG (all  $p<0.0001$ ) and cFT (all  $p<0.0001$ ). The  
33 number of men with high (mean+2SD) gonadotropin levels was very small (1-4 men for FSH  
34 0.3-1.3%, and 2-14 for LH 0.7-4.7%). T/LH ratio of men from Kawasaki, Osaka, Kanazawa,  
35 and Nagawaki were  $9.74\pm 4.26$ ,  $8.75\pm 3.54$ ,  $8.36\pm 3.76$ , and  $7.45\pm 3.51$ , respectively. All  
36 pair-wise comparisons between centres except Osaka vs. Nagasaki were statistically  
37 significant ( $p<0.0001-0.01$ ).  
38  
39  
40  
41  
42  
43  
44

45  
46 For the entire group of men the median (5-95 percentiles) sizes of the left and right  
47 testes were both 22 ml (14-28 ml). The average testis size (mean of left and right) differed  
48 significantly between the study groups, ranging from 19 to 23 ml in medians (Table 1).  
49 Overall 98.8% of study subjects had a pubic hair distribution of Tanner stage 4 or higher:  
50 Kawasaki 98.2%, Osaka 98.0%, Kanazawa 100% and Nagasaki 99.7%.  
51  
52  
53

54  
55 During the physical examination 27.1% of men was diagnosed with a varicocele;  
56 14.3% stage 1, 9.1% stage 2, and 3.7% stage 3. Varicocele was on the left side only  
57  
58  
59  
60

1  
2  
3  
4  
5  
6 in 23.6%, both sides in 2.9% and only on the right side in 0.6% of men. The presence of a  
7  
8 varicocele was non-significantly associated with an 8% (95% confidence interval –  
9  
10 20%;+6%) reduction in sperm concentration and 11% decline (-23%;+4%) in total sperm  
11  
12 count. No tendencies could be detected for sperm motility or morphology. Inhibin-B and total  
13  
14 testosterone tended to be lower in men having a varicocele, however, non-significantly  
15  
16 (p>0.05).

## 17 18 19 **DISCUSSION**

20  
21 Sperm concentration, total sperm count, percentage of morphologically normal spermatozoa  
22  
23 and percentage of motile spermatozoa varied tremendously between individual participants.  
24  
25 However, only small but statistically significant differences were detected for both semen  
26  
27 and reproductive hormone levels between young men from the four provinces in Japan.  
28  
29 Thus, from a biological point of view these groups of men can be regarded as similar. As  
30  
31 expected, semen quality of the young men was significantly poorer than that of partners of  
32  
33 pregnant women.

34  
35 To our knowledge, this is the first large-scale prospectively designed study to explore  
36  
37 potential differences in testicular function parameters in Japanese men that were not se-  
38  
39 lected by any fertility status. The men were enrolled by the same type of advertisement.  
40  
41 They were all university students. We tested for effects of various covariates and accounted  
42  
43 for these when necessary. Thus, the comparison between the four groups is valid, and the  
44  
45 results may serve as a reference for future studies on time trends in semen quality.

46  
47 In Japan, there is not a compulsory medical examination of young men as in the  
48  
49 Northern-European countries,<sup>4,7</sup> which makes it difficult to recruit men that are representa-  
50  
51 tive for the general population. Itoh *et al*<sup>10</sup> detected a median sperm concentration of 81  
52  
53 million/mL in 207 young men (18-22 years old) examined in 1998 in Sapporo but also con-  
54  
55 cluded that selection bias in the recruitment and variable ejaculation abstinence might have  
56  
57 affected the results. In the design of our study, we therefore decided to restrict the invitation  
58  
59 to university students to get a well-characterized study population. Men who have experi-  
60

1  
2  
3  
4  
5  
6  
7  
8  
9  
10  
11  
12  
13  
14  
15  
16  
17  
18  
19  
20  
21  
22  
23  
24  
25  
26  
27  
28  
29  
30  
31  
32  
33  
34  
35  
36  
37  
38  
39  
40  
41  
42  
43  
44  
45  
46  
47  
48  
49  
50  
51  
52  
53  
54  
55  
56  
57  
58  
59  
60

enced fertility problems may be more likely to volunteer for semen studies than men without any problems.<sup>14</sup> Since the sperm count cannot be known without laboratory analysis, it is unlikely that any of the volunteers would have had such information. Testicular size might hint to fertility problem if it were very small. However, there was only small difference (slightly larger in the present cohort) between the testicular size of the young and the fertile men<sup>15</sup> in Japan. Moreover, semen variables of the healthy subgroup of young men (n=1,307) who had no history of reproductive problems were very similar to those of the entire study population (n=1,559). Likewise, it should be noted that the incidence of cryptorchidism was considerably high, which could be an indicator of recruitment bias. In the present study, however, it is unlikely to be a recruitment bias, because the information about cryptorchidism was based on the questionnaire data, i.e. history of cryptorchidism, not current cryptorchidism. This included cryptorchidism at any time, i.e. both congenital and acquired, which may have different causes and consequences. In fact, there were no differences in semen quality between the healthy subgroup of young men (Supplemental Table 1) and the entire study population (Table 2) including the men with history of cryptorchidism or other reproductive problems. We restricted the age of participants to 18-24 years assuming that the majority in such a group would not yet have any direct knowledge about their own fertility chances, since the average Japanese man fathers his first child at the age of 31.8 years.<sup>16</sup> Less than 1% of the participants had experienced fertility problems, and such problems are therefore unlikely to severely bias the obtained results. Poorly educated men may be more likely to refuse participation in studies that require delivery of semen samples.<sup>17</sup> However, higher educational level has been positively associated with semen quality.<sup>17 18</sup> Thus, the selection of university students may bias the results towards a higher level. Nevertheless, semen variables of the healthy subgroup of young men (Supplemental Table 1) who had no history of reproductive problems were very similar to those of the entire study population (Table 2). We thus considered that semen results of the present study population was unlikely to have been subjected to a significant bias.

1  
2  
3  
4  
5  
6  
7  
8  
9  
10  
11  
12  
13  
14  
15  
16  
17  
18  
19  
20  
21  
22  
23  
24  
25  
26  
27  
28  
29  
30  
31  
32  
33  
34  
35  
36  
37  
38  
39  
40  
41  
42  
43  
44  
45  
46  
47  
48  
49  
50  
51  
52  
53  
54  
55  
56  
57  
58  
59  
60

There were small differences in inhibin-B levels that were lower in men from Kanazawa and Nagasaki than in men from Kawasaki and Osaka. Similar trends were detected for total testosterone, SHBG, and cFT. The slightly higher inhibin-B levels in men from Kawasaki and Osaka could theoretically indicate a higher spermatogenic activity in these, which however does not fit with the sperm count findings. Also, we hesitate to draw such a conclusion since the detected inhibin-B concentrations at this level do not correlate strongly with sperm counts.<sup>19</sup> We have no explanation for the higher total testosterone in men from Kawasaki and Osaka compared to other centres. It is important to keep in mind that the adjusted hormone levels in Table 3 were adjusted for the effect of BMI, which thus does not explain the findings. T/LH ratio may inform about Leydig cell function, and therefore we also analysed it. Variation between the study centres was small but statistically significant; however, biological significance of variation in this scale is questionable.

Diagnostic accuracy of varicocele is very dependent on the clinical experience of the investigator. The high frequency of varicocele may reflect this, since the majority of the cases were grade 1. We saw no significant negative effect on semen quality, which however, is likely due to the low grade in most varicoceles.

In the European studies semen volume was assessed by weighing which now is the “gold standard”, because aspiration – as used in our study – underestimates the volume by approximately 0.4 mL.<sup>20 21</sup> Thus, the true median semen volume might have been 3.4 mL, which is closer to the volumes reported from Finland, Denmark, Germany, and Spain,<sup>3 7 8</sup> and thus the adjusted median total sperm count in our study would have been 200 million rather than 177. Inter-observer variation may explain the higher semen volume detected in men from Kanazawa compared to other centres, because volume measurements were not under external quality control.

Three Chinese studies have described semen qualities in apparently normal men. Healthy men, 20-60 years of age, had a median sperm concentration and total sperm count of approximately 65 million/mL and 154 million, respectively.<sup>22</sup> The youngest age group, 20-25 years old, comprised only 6.1% of the study population, and overall 83% had previ-

1  
2  
3  
4  
5  
6 ously fathered a child. Another study investigated 20-40 years old men but excluded those  
7 with known andrological diseases and reported a median sperm concentration and total  
8 sperm count of 78 million/mL and 168 million.<sup>23</sup> Junqing *et al*<sup>24</sup> detected a mean sperm  
9 concentration and total sperm count of 55 million/mL and 124 million, respectively, in 22-30  
10 years old men that underwent a premarital physical examination. Thus, the latter may be  
11 more comparable to ours, since the men presumably had little knowledge of their fertility  
12 potential. These Chinese reference values are clearly lower than the current Japanese fig-  
13 ures, suggesting that there are regional differences in semen quality among Asian men.  
14 Interestingly, Chinese men who had at least a college education had lower sperm counts  
15 than men with a lower educational status.<sup>24</sup> If this were true also for Japanese men, the  
16 difference in semen quality between Japanese and Chinese men would be even greater  
17 than what is evident from the present results.  
18  
19  
20  
21  
22  
23  
24  
25  
26  
27

28 Other studies have shown an adverse effect of maternal smoking during pregnancy  
29 on the son's semen quality.<sup>25-27</sup> However, we did not find such an effect, probably because  
30 the number of smoking mothers was very small. By contrast, the smoking rates of the young  
31 men themselves looks exceedingly high for a developed nation, but this is a common trend  
32 in Japanese male, which is consistent with the figures from National Health and Nutrition  
33 Survey (47.4% in total and 60.8% in 20-29 age group in 2000)<sup>28</sup>, as well as the results from  
34 the previous our study of the fertile Japanese men (52.8% in total).<sup>15</sup>  
35  
36  
37  
38  
39  
40

41 The Japanese men appeared to have higher sperm counts than men from the North-  
42 ern Europe<sup>4 5 7 29-32</sup> but slightly lower than men from Spain.<sup>8</sup> Thus, Japanese men may be  
43 ranked as having better sperm counts than many populations of European young men.  
44 Nevertheless, this does not imply that impaired semen quality is not a problem among  
45 young Japanese men. Nearly 10% had sperm counts below the current WHO reference  
46 levels of 15 million/mL or 39 million<sup>32</sup> rendering them for high risk of reduced fertility in the  
47 future. Nearly one third of men had sperm concentration less than 40 million/mL, indicating  
48 reduced fecundity.<sup>34-37</sup> We are therefore concerned that a significant proportion of the men  
49 may experience problems when they reach the ages when they want to reproduce.<sup>34-37</sup>  
50  
51  
52  
53  
54  
55  
56  
57  
58  
59  
60

1  
2  
3  
4  
5  
6 Our prospectively designed study showed no overall difference between men from the  
7 four investigation sites, and the semen results were similar to those previously reported for  
8 Finnish men that until now have been considered to have the best semen quality among  
9 young men from the Northern Europe. The study cohorts were, however, not completely  
10 comparable. The recently detected adverse trends in semen quality and testis cancer inci-  
11 dences among men from Finland suggest underlying environmental causes.<sup>32</sup> Whether the  
12 semen quality of Japanese men has changed over the years cannot be answered by our  
13 current study, but a large proportion of investigated men were shown to have sub-optimal  
14 sperm counts. These results will serve as a reference for future studies on time trends in  
15 semen quality in Japan and for comparison with future studies of university students in other  
16 countries.  
17  
18  
19  
20  
21  
22  
23  
24  
25  
26  
27  
28  
29  
30  
31  
32  
33  
34  
35  
36  
37  
38  
39  
40  
41  
42  
43  
44  
45  
46  
47  
48  
49  
50  
51  
52  
53  
54  
55  
56  
57  
58  
59  
60

**Table 1:** Physical appearance and self-reported information of young men from four cities in Japan.

|                                               | Entire study population (n=1559) |                      | Kawasaki (n=658) |                      | Osaka (n=300) |                      | Kanazawa (n=300) |                      | Nagasaki (n=301) |                      | p-values             |
|-----------------------------------------------|----------------------------------|----------------------|------------------|----------------------|---------------|----------------------|------------------|----------------------|------------------|----------------------|----------------------|
|                                               | Mean (SD)                        | Median (5-95)        | Mean (SD)        | Median (5-95)        | Mean (SD)     | Median (5-95)        | Mean (SD)        | Median (5-95)        | Mean (SD)        | Median (5-95)        |                      |
| Height (cms)                                  | 172 (6)                          | 172 (163-181)        | 172 (6)          | 172 (163-182)        | 172 (6)       | 172 (163-181)        | 173 (6)          | 173 (163-181)        | 172 (5)          | 171 (163-180)        | 0.01 <sup>A</sup>    |
| Weight (kgs)                                  | 64 (9)                           | 63 (52-79)           | 64 (11)          | 63 (52-80)           | 63 (8)        | 63 (52-77)           | 64 (8)           | 63 (52-80)           | 63 (9)           | 62 (52-82)           | 0.4 <sup>A</sup>     |
| BMI (kg/m <sup>2</sup> )                      | 21.4 (2.7)                       | 21.0 (18.2-26.0)     | 21.5 (3.0)       | 21.0 (18.2-26.0)     | 21.2 (2.2)    | 20.9 (18.2-25.4)     | 21.4 (2.4)       | 21.1 (18.4-25.8)     | 21.6 (2.6)       | 21.3 (18.0-26.2)     | 0.2 <sup>A</sup>     |
| Mean of left and right size (ml) <sup>a</sup> | 21 (4)                           | 22 (14-28)           | 22 (4)           | 22 (15-28)           | 22 (5)        | 23 (14-29)           | 21 (4)           | 21 (14-29)           | 20 (4)           | 19 (13-26)           | <0.0001 <sup>A</sup> |
| Age (years) <sup>b</sup>                      | 21.3 (1.6)                       | 21.1 (18.9-24.1)     | 20.8 (1.4)       | 20.7 (18.7-23.4)     | 21.7 (1.6)    | 21.6 (19.3-24.4)     | 21.8 (1.6)       | 21.9 (18.9-24.2)     | 21.3 (1.7)       | 21.2 (18.9-24.2)     | <0.0001 <sup>A</sup> |
| School education (years) <sup>c</sup>         | 15 (2)                           | 15 (12-18)           | 14 (2)           | 14 (12-17)           | 15 (2)        | 15 (12-18)           | 15 (2)           | 15 (12-18)           | 15 (2)           | 15 (12-18)           | <0.0001 <sup>A</sup> |
| Ejaculation abstinence (hours) <sup>d</sup>   | 78 (36)                          | 65 (50-136)          | 76 (32)          | 64 (49-136)          | 77 (35)       | 64 (50-136)          | 82(51)           | 67 (51-138)          | 78 (28)          | 66 (51-136)          | 0.0002 <sup>A</sup>  |
|                                               |                                  | <b>Frequency (%)</b> |                  | <b>Frequency (%)</b> |               | <b>Frequency (%)</b> |                  | <b>Frequency (%)</b> |                  | <b>Frequency (%)</b> |                      |
| Have (had)                                    |                                  |                      |                  |                      |               |                      |                  |                      |                  |                      |                      |
| Crvotorchidism <sup>e</sup>                   |                                  | 8.2                  |                  | 6.9                  |               | 8.3                  |                  | 12.7                 |                  | 6.3                  | 0.02 <sup>B</sup>    |
| Testicular torsion                            |                                  | 0.1                  |                  | 0.2                  |               | 0.0                  |                  | 0.3                  |                  | 0.0                  | 0.5 <sup>B</sup>     |
| Orchitis                                      |                                  | 1.4                  |                  | 1.6                  |               | 1.7                  |                  | 1.0                  |                  | 1.0                  | 0.8 <sup>B</sup>     |
| Varicocele                                    |                                  | 0.1                  |                  | 0.0                  |               | 0.3                  |                  | 0.3                  |                  | 0.0                  | 0.2 <sup>B</sup>     |
| Inguinal hernia                               |                                  | 1.1                  |                  | 0.7                  |               | 2.3                  |                  | 1.0                  |                  | 1.0                  | 0.2 <sup>B</sup>     |
| STD <sup>f</sup>                              |                                  | 2.1                  |                  | 2.8                  |               | 1.0                  |                  | 1.3                  |                  | 2.3                  | 0.3 <sup>B</sup>     |
| Thyroid disease or diabetes                   |                                  | 0.1                  |                  | 0.2                  |               | 0.3                  |                  | 0.0                  |                  | 0.0                  | 0.7 <sup>B</sup>     |
| Taken medicine <sup>g</sup>                   |                                  | 10.4                 |                  | 13.7                 |               | 8.0                  |                  | 8.7                  |                  | 7.3                  | 0.0006 <sup>B</sup>  |
| Caused pregnancy                              |                                  | 3.8                  |                  | 4.4                  |               | 2.7                  |                  | 3.3                  |                  | 4.0                  | 0.6 <sup>B</sup>     |
| Experienced fertility problem <sup>h</sup>    |                                  | 0.9                  |                  | 1.8                  |               | 0.3                  |                  | 0.0                  |                  | 0.7                  | 0.03 <sup>B</sup>    |
| Varicocele diagnosed in studv <sup>i</sup>    |                                  | 27.1                 |                  | 26.8                 |               | 24.3                 |                  | 20.0                 |                  | 37.5                 | <0.0001 <sup>B</sup> |
| Tobacco smoker                                |                                  | 49.6                 |                  | 62.4                 |               | 34.6                 |                  | 42.8                 |                  | 45.0                 | <0.0001 <sup>B</sup> |
| Exposed to tobacco in utero <sup>j</sup>      |                                  | 2.0                  |                  | 2.5                  |               | 1.3                  |                  | 1.3                  |                  | 2.3                  | 0.6 <sup>B</sup>     |

**SD:** Standard deviation.  
**(5-95):** 5-95th percentile.

**a:** Size assessed by palpation. Two men had non-palpable left testicles, one from Kawasaki and one from Kanazawa due to previous orchidectomy because of testicular torsion.

**b:** Age calculated as difference between day of attendance in study and self-reported day of birth.

**c:** All participants were university students.

**d:** Ejaculation abstinence period calculated as difference between time of current ejaculation and self-reported time of previous ejaculation.

**e:** Not born with both testicles in scrotum (irrespective of spontaneous descend or treatment).

**f:** Diagnosed with epididymitis, chlamydia or gonorrhoea.

**g:** Taken any medication recent 3 months prior to participation in study. For 93%, 61%, 61% and 60% from Kawasaki, Osaka, Kanazawa and Nagasaki, respectively it was against either infection, allergy or pain.

**h:** Have had unprotected intercourse without causing a pregnancy during a 12 months period.

**i:** Varicocele diagnosed during this study, irrespective of previous self-reported information.

**j:** In utero exposed to maternal tobacco smoking.

**A:** Kruskal-Wallis test

**B:** Fisher's exact test



**Table 2:** Semen quality of young men from four cities in Japan.

|                                                     | Observed   |               | Adjusted         |
|-----------------------------------------------------|------------|---------------|------------------|
|                                                     | Mean (SD)  | Median (5-95) | Median (95%CI)   |
| Semen volume (ml)                                   |            |               |                  |
| Entire study population                             | 2.9 (1.4)  | 2.7 (1.0-5.5) | 3.0 (2.8-3.2)    |
| Kawasaki                                            | 2.7 (1.3)  | 2.5 (0.9-5.2) | 2.8 (2.7-3.2)    |
| Osaka                                               | 2.9 (1.4)  | 2.7 (1.0-5.6) | 2.9 (2.7-3.2)    |
| Kanazawa                                            | 3.3 (1.5)  | 3.0 (1.2-6.4) | 3.3 (3.1-3.6)    |
| Nagasaki                                            | 2.9 (1.4)  | 2.8 (0.9-5.4) | 3.0 (2.8-3.2)    |
| p-value                                             |            |               | p=0.0006         |
| Sperm concentration (mill/ml)                       |            |               |                  |
| Entire study population                             | 73 (58)    | 59 (10-185)   | 59 (52-68)       |
| Kawasaki                                            | 71 (61)    | 55 (9-185)    | 57 (48-66)       |
| Osaka                                               | 75 (61)    | 60 (9-195)    | 61 (50-74)       |
| Kanazawa                                            | 72 (55)    | 60 (7-183)    | 61 (51-73)       |
| Nagasaki                                            | 76 (54)    | 64 (12-181)   | 61 (51-74)       |
| p-value                                             |            |               | p=0.138          |
| Total sperm count (mill)                            |            |               |                  |
| Entire study population                             | 201 (183)  | 159 (18-509)  | 177 (153-206)    |
| Kawasaki                                            | 185 (193)  | 143 (17-472)  | 161 (135-191)    |
| Osaka                                               | 202 (178)  | 163 (28-508)  | 179 (146-221)    |
| Kanazawa                                            | 228 (184)  | 185 (15-546)  | 201 (165-246)    |
| Nagasaki                                            | 201 (161)  | 166 (22-531)  | 183 (150-224)    |
| p-value                                             |            |               | p=0.002          |
| Motile spermatozoa (%)                              |            |               |                  |
| Entire study population                             | 67 (14)    | 69 (42-88)    | 67 (65-69)       |
| Kawasaki                                            | 66 (14)    | 68 (40-87)    | 65 (62-67)       |
| Osaka                                               | 67 (12)    | 67 (52-84)    | 64 (61-67)       |
| Kanazawa                                            | 62 (14)    | 64 (38-82)    | 60 (57-63)       |
| Nagasaki                                            | 76 (14)    | 78 (48-93)    | 75 (73-78)       |
| p-value                                             |            |               | p<0.0001         |
| Morphologically normal spermatozoa (%) <sup>a</sup> |            |               |                  |
| Entire study population                             | 10.3 (6.0) | 9 (2.5-21.5)  | 9.9 (8.8-10.9)   |
| Kawasaki                                            | 10.5 (6.2) | 9 (2.5-23)    | 9.3 (7.9-10.6)   |
| Osaka                                               | 9.2 (5.2)  | 8.5 (2.5-19)  | 8.5 (7.2-9.8)    |
| Kanazawa                                            | 10.0 (6.1) | 8.8 (2-21)    | 9.3 (8.0-10.5)   |
| Nagasaki                                            | 11.7 (6.1) | 11 (3-23)     | 11.2 (10.0-12.4) |
| p-value                                             |            |               | p<0.0001         |

**Observed:** Results based on raw data.

**SD:** Standard deviation.

**(5-95):** 5-95th percentile.

**Adjusted median and 95%CI** (confidence interval) calculated by linear regression analysis.

Semen volume, sperm concentration and total sperm counts adjusted to a period of ejaculation abstinence of 96 h for a 21 years-old-man

Motility and morphology adjusted for a 21 years-old-man, winter season

See text for further explanation.

**p-value:** Based on regression analyses of cubic root transformed values, comparing all four groups.

**a:** Morphology results only available for 869 men.

**Table 3:** Reproductive hormone levels of young men from four cities in Japan

|                                  | Observed  |                | Adjusted       |
|----------------------------------|-----------|----------------|----------------|
|                                  | Mean (SD) | Median (5-95)  | Median (95%CI) |
| <b>FSH (U/l)</b>                 |           |                |                |
| Entire study population          | 2.5 (1.3) | 2.2 (1.1-4.9)  | 2.3 (2.2-2.5)  |
| Kawasaki                         | 2.7 (1.3) | 2.4 (1.1-5.2)  | 2.4 (2.3-2.6)  |
| Osaka                            | 2.5 (1.3) | 2.2 (1.1-5.0)  | 2.3 (2.1-2.4)  |
| Kanazawa                         | 2.3 (1.3) | 2.1 (1-4.4)    | 2.1 (1.9-2.3)  |
| Nagasaki                         | 2.3 (1.2) | 2.1 (0.9-4.4)  | 2.1 (1.9-2.2)  |
| p-value                          |           |                | p<0.0001       |
| <b>Inhibin-B (pg/ml)</b>         |           |                |                |
| Entire study population          | 202 (64)  | 197 (110-314)  | 190 (181-199)  |
| Kawasaki                         | 207 (64)  | 202 (113-322)  | 191 (181-201)  |
| Osaka                            | 214 (67)  | 210 (117-336)  | 193 (182-205)  |
| Kanazawa                         | 191 (62)  | 190 (104-304)  | 177 (164-191)  |
| Nagasaki                         | 188 (60)  | 182 (103-286)  | 176 (165-187)  |
| p-value                          |           |                | p=0.003        |
| <b>LH (U/l)</b>                  |           |                |                |
| Entire study population          | 3.2 (1.3) | 2.9 (1.5-5.6)  | 2.7 (2.6-2.9)  |
| Kawasaki                         | 3 (1.3)   | 2.8 (1.4-5.3)  | 2.7 (2.5-2.8)  |
| Osaka                            | 3.5 (1.4) | 3.2 (1.8-6.4)  | 3.0 (2.9-3.2)  |
| Kanazawa                         | 3.3 (1.4) | 3.1 (1.6-5.8)  | 2.8 (2.6-3.1)  |
| Nagasaki                         | 2.9 (1.0) | 2.8 (1.5-4.9)  | 2.6 (2.4-2.8)  |
| p-value                          |           |                | p<0.0001       |
| <b>Testosterone (nmol/l)</b>     |           |                |                |
| Entire study population          | 25 (8)    | 24 (14-39)     | 26 (25-27)     |
| Kawasaki                         | 26 (7)    | 25 (15-39)     | 26 (25-27)     |
| Osaka                            | 27 (9)    | 26 (15-42)     | 27 (26-28)     |
| Kanazawa                         | 22 (7)    | 21 (12-35)     | 23 (21-24)     |
| Nagasaki                         | 22 (7)    | 21 (13-36)     | 23 (21-24)     |
| p-value                          |           |                | p<0.0001       |
| <b>SHBG (nmol/l)</b>             |           |                |                |
| Entire study population          | 28 (11)   | 26 (13-46)     | 27 (26-28)     |
| Kawasaki                         | 30 (11)   | 29 (14-49)     | 28 (27-30)     |
| Osaka                            | 29 (11)   | 27 (14-50)     | 26 (25-28)     |
| Kanazawa                         | 24 (9)    | 23 (12-41)     | 23 (21-24)     |
| Nagasaki                         | 24 (9)    | 23 (12-42)     | 23 (21-24)     |
| p-value                          |           |                | p<0.0001       |
| <b>cFT (pmol/l) <sup>a</sup></b> |           |                |                |
| Entire study population          | 607 (192) | 585 (326-949)  | 638 (613-663)  |
| Kawasaki                         | 619 (181) | 605 (339-924)  | 630 (604-657)  |
| Osaka                            | 672 (214) | 649 (371-1029) | 675 (642-710)  |
| Kanazawa                         | 556 (183) | 527 (298-894)  | 589 (552-628)  |
| Nagasaki                         | 566 (177) | 550 (316-922)  | 583 (552-615)  |
| p-value                          |           |                | p<0.0001       |

**Observed:** Results based on raw data.

**SD:** Standard deviation.

**(5-95):** 5-95th percentile.

**Adjusted median and 95%CI** (confidence interval) calculated by linear regression analysis, adjusted to blood sampling at 10:00 am in winter season, representing of 21 years-old man having a BMI of 21.

**p-value:** Based on regression analyses of natural logarithmic transformed values, comparing all four groups.

**a:** Calculated free-testosterone.

## Ethics

This study got the approval of the Ethics Review Board in each university and hospital. All participants gave their written consent before participating in the study.

## Acknowledgements

Drs. K. Nishimura, H. Miura, M. Yamanaka are acknowledged for performing physical examinations of the young men. Ms K. Ohata, M. Haruki, and M. Okayama are acknowledged for coordinating the recruitment of the young men. Ms M. Nakanome, S. Okabe, K. Takakura, and Y. Kawabuchi are acknowledged for examination of semen quality. And all other technicians and study nurses of the four centres are acknowledged for coordinating the recruitment and for examination of semen quality. All the volunteers participating in the study are thanked. Without their participation the study would not have been possible.

## Funding

This study has been supported economically by several grants: The Ministry of Health and Welfare, Japan (Grant nos. H10-Seikatsu-017 and H13-Seikatsu-014 to TI, AO, MN, and JE). Japan Society for the Promotion of Science (nos. 1113001 and 1214001 to TI) and The JSPS Invitation Fellowship Programme (invited scientist from Denmark, NJ) by Japan Society for the Promotion of Science (ID no. S10110), Rigshospitalet (Grant no. 961506336) to NJ, Academy of Finland, Sigrid Juselius Foundation and Turku University Hospital to JT. The funding organisations played no role in the design and conduct of the study, in collection, management, analysis, and interpretation of the data; or in the presentation, review, or approval of the manuscript.

### Data sharing statement

There is no additional data available.

### Contributor statement

NJ, NES, JT, SN, MNM, MY and TI conceived and designed this study.

Acquisition of data: TI, MY, SN, KY, KB, MN, EK, JK, AO, KM, AT, HK, and JE.

Data analysis was performed by MNM, NJ and TI.

NJ, TI, SN and JT drafted the manuscript.

MV assessed the sperm morphology smears.

JK, EK, MN, KB, KY, AT, KM, AO, JE, HK and TI performed the physical examinations and collected the data.

All authors participated in the interpretation of data.

- Revising the article critically for important intellectual content: All authors.
- Final approval of the version to be published: All authors.

### References

1. Fisch H, Goluboff ET, Olson JH, *et al.* Semen analysis in 1283 men from the United States over a 25-year period: no decline in quality. *Fertil Steril* 1996;**65**:1009-1414.
2. Vierula M, Niemi M, Keiski A, *et al.* High and unchanged sperm counts of Finnish men. *Int J Androl* 1996;**19**:11-7.
3. Jørgensen N, Andersen AG, Eustache F, *et al.* Regional differences in semen quality in Europe. *Hum Reprod* 2001;**16**:1012-9.
4. Jørgensen N, Carlsen E, Nermoen I, *et al.* East-West gradient in semen quality in the Nordic-Baltic area: a study of men from the general population in Denmark, Norway, Estonia and Finland. *Hum Reprod* 2002;**17**:2199-208.

- 1  
2  
3  
4  
5  
6 5. Punab M, Zilaitiene B, Jørgensen N, *et al.* Regional differences in semen qualities in  
7  
8 the Baltic region. *Int J Androl* 2002;**25**:243-52
- 9  
10 6. Swan SH, Brazil C, Drobinis EZ *et al.* Geographic differences in semen quality of fertile  
11  
12 US males. *Environ Health Perspect* 2003;111:414-420.
- 13  
14 7. Paasch U, Salzbrunn A, Glander HJ, *et al.* Semen quality in sub-fertile range for a sig-  
15  
16 nificant proportion of young men from the general German population: a co-ordinated,  
17  
18 controlled study of 791 men from Hamburg and Leipzig. *Int J Androl* 2008;**31**:93-102.
- 19  
20 8. Fernandez MF, Duran I, Olea N, *et al.* Semen quality and reproductive hormone levels  
21  
22 in men from southern Spain. *Int J Androl* 2012;**35**:1-10
- 23  
24 9. Adami HO, Bergström R, Möhner M, *et al.* Testicular cancer in nine northern European  
25  
26 countries. *Int J Cancer* 1994;**59**:33-8.
- 27  
28 10. Itoh N, Kayama F, Tatsuki TJ, *et al.* Have sperm counts deteriorated over the past 20  
29  
30 years in healthy, young Japanese men? Results from the Sapporo area. *J Androl*  
31  
32 2001;**22**:40-4.
- 33  
34 11. World Health Organization. Laboratory manual for examination of human semen and  
35  
36 sperm-cervical mucus interaction. 4th edition, Cambridge, UK, Cambridge University  
37  
38 Press, 1992.
- 39  
40 12. Menkveld R, Stander FS, *et al.* The evaluation of morphological characteristics of hu-  
41  
42 man spermatozoa according to stricter criteria. *Hum Reprod* 1990;**5**:586-92.
- 43  
44 13. Vermeulen A, Verdonck L, Kaufman JM. A critical evaluation of simple methods for the  
45  
46 estimation of free testosterone in serum. *J Clin Endocrinol Metab* 1999;**84**:3666-72.
- 47  
48 14. Muller A, De La Rochebrochard E, Labbé-Declèves C, *et al.* Selection bias in semen  
49  
50 studies due to self-selection of volunteers. *Hum Reprod* 2004;**19**:2838-44.
- 51  
52  
53  
54  
55  
56  
57  
58  
59  
60

- 1  
2  
3  
4  
5  
6 15. Teruaki Iwamoto, Shiari Nozawa, Miki Yoshiike, et al. Semen quality of fertile Japanese  
7  
8 men: a cross-sectional population-based study of 792 men. *BMJ Open* 2013;**3**:  
9  
10 e002223.
- 11  
12 16. Vital statistics in Japan, Ministry of Health, Labour and Welfare Japan, 2009
- 13  
14 17. Jensen TK, Slama R, Ducot B, et al. Regional differences in waiting time to pregnancy  
15  
16 among fertile couples from four European cities. *Hum Reprod* 2001;**16**:2697-2704.
- 17  
18 18. Eustache F, Auger J, Cabrol D, et al. Are volunteers delivering semen samples in fertil-  
19  
20 ity studies a biased population? *Hum Reprod* 2004;**19**:2831-7.
- 21  
22 19. Jørgensen N, Liu F, Andersson AM, et al. Serum inhibin-B in fertile men is strongly  
23  
24 correlated with low but not high sperm counts: a coordinated study of 1,797 European  
25  
26 and US men. *Fertil Steril* 2010;**94**:2128-34.
- 27  
28 20. Jørgensen N, Auger J, Giwercman A, et al. Semen analysis performed by different  
29  
30 laboratory teams: an intervariation study. *Int J Androl* 1997;**20**:201-208.
- 31  
32 21. Cooper TG, Brazil C, Swan SH, et al. Ejaculate volume is seriously underestimated  
33  
34 when semen is pipetted or decanted into cylinders from the collection vessel. *J Androl*  
35  
36 2007;**28**:1-4.
- 37  
38 22. Gao J, Gao ES, Yang Q, et al. Semen quality in a residential, geographic and age  
39  
40 representative sample of healthy Chinese men. *Hum Reprod* 2007;**22**:477-484.
- 41  
42 23. Li Y, Lin H, Ma M, et al. Semen quality of 1346 healthy men, results from the Chongqing  
43  
44 area of southwest China. *Hum Reprod* 2009;**24**:459-469.
- 45  
46 24. Junqing W, Qiuying Y, Jianguo T, et al. Reference value of semen quality in Chinese  
47  
48 young men. *Contraception* 2002;**65**:365-368.
- 49  
50 25. Storgaard L, Bonde JP, Ernst E, et al. Does smoking pregnancy affect son's sperm  
51  
52 count?. *Epidemiology* 2003;**14**:278-86  
53  
54  
55  
56  
57  
58  
59  
60

- 1  
2  
3  
4  
5  
6 26. Jensen TK, Jørgensen N, Punab M, *et al.* Association of in utero exposure to maternal  
7 smoking with reduced semen quality and testis size in adulthood: a cross-sectional  
8 study of 1,770 young men from the general population in five European countries. *Am J*  
9 *Epidemiol* 2004;**159**:49-58.
- 10  
11  
12  
13  
14 27. Ranvborg TL, Jensen TK, Andersen AM, *et al.* Prenatal and adult exposures to smoking  
15 are associated with adverse effects on reproductive hormones, semen quality, final  
16 height and body mass index. *Hum Reorod* 2011;**26**:1000-11.
- 17  
18  
19  
20  
21 28. The National Health and Nutrition Survey 2008, Ministry of Health, Labour and Welfare,  
22 Japan
- 23  
24  
25 29. Jørgensen N, Asklund C, Carlsen E, *et al.* Coordinated European investigations of  
26 semen quality: Results from studies of Scandinavian young men is a matter of concern.  
27 *Int J Androl* 2006;**29**:54-61..
- 28  
29  
30  
31  
32 30. Axelsson J, Rylander L, Ringnell-Hybdom A, *et al.* No secular trend over the last dec-  
33 ade in sperm counts among Swedish men from general population. *Hum Reprod*  
34 2011;**26**:1012-16
- 35  
36  
37  
38 31. Tsarev I, Gagonin V, Giwercman A, *et al.* Sperm concentration in Latvian military con-  
39 scripts as compared with other countries in the Nordic-Baltic area. *Int J Androl*  
40 2005;**28**:208-214.
- 41  
42  
43  
44 32. Jørgensen N, Vierula M, Jacobsen R, *et al.* Recent adverse trends in semen quality and  
45 testis cancer incidence among Finnish men. *Int J Androl* 2011;**34**:e37-48.
- 46  
47  
48  
49 33. World Health Organisation. WHO Laboratory Manual for the Examination and Pro-  
50 cessing of Human Semen. 5<sup>th</sup> edn. 2010.
- 51  
52  
53 [http://whqlibdoc.who.int/publications/2010/9789241547789\\_eng.pdf](http://whqlibdoc.who.int/publications/2010/9789241547789_eng.pdf)  
54  
55  
56  
57  
58  
59  
60

- 1  
2  
3  
4  
5  
6 34. Bonde JP, Ernst E, Jensen TK, *et al.* Relation between semen quality and fertility: a  
7 population-based study of 430 first-pregnancy planners. *Lancet* 1998;**352**:1172-7.  
8  
9  
10 35. Guzick DS, Overstreet JW, Factor-Litvak P, *et al.* Sperm morphology, motility, and  
11 concentration in fertile and infertile men. *N Engl J Med* 2001;**345**:1388-93.  
12  
13  
14 36. Slama R, Eustache F, Ducot B, *et al.* Time to pregnancy and semen parameters: a  
15 cross-sectional study among fertile couples from four European cities. *Hum Reprod*  
16 2002;**17**:503-15.  
17  
18  
19  
20  
21 37. Jedrzejczak P, Taszarek-Hauke G, Hauke J, *et al.* Prediction of spontaneous concep-  
22 tion based on semen parameters. *Int J Androl* 2008;**31**:499-507.  
23  
24  
25  
26  
27  
28  
29  
30  
31  
32  
33  
34  
35  
36  
37  
38  
39  
40  
41  
42  
43  
44  
45  
46  
47  
48  
49  
50  
51  
52  
53  
54  
55  
56  
57  
58  
59  
60



**Title:**

Semen quality of 1,559 young men from four cities in Japan

**Study design:**

Cross sectional population-based study

**Authors**

Teruaki Iwamoto<sup>1,2</sup>, Shiari Nozawa<sup>2</sup>, Makiko Naka Mieno<sup>3</sup>, Katsunori Yamakawa<sup>2</sup>, Katsuyuki Baba<sup>2</sup>, Miki Yoshiike<sup>2</sup>, Mikio Namiki<sup>4</sup>, Eitetsu Koh<sup>4</sup>, Jiro Kanaya<sup>4</sup>, Akihiko Okuyama<sup>5</sup>, Kiyomi Matsumiya<sup>5</sup>, Akira Tsujimura<sup>5</sup>, Hiroshi Kanetake<sup>6</sup>, Jiro Eguchi<sup>6</sup>, Niels E. Skakkebaek<sup>7</sup>, Matti Vierula<sup>8</sup>, Jorma Toppari<sup>8</sup>, –and Niels Jørgensen<sup>7</sup>

**From:**

<sup>1</sup> Division of Male Infertility, Centre for Infertility and IVF, International University of Health and Welfare Hospital, Nasushiobara, Japan

<sup>2</sup> Department of Urology, St. Marianna University School of Medicine, Kawasaki, Japan

<sup>3</sup> Department of Medical Informatics, Centre for Information, Jichi Medical University, Shimotsuke, Japan

<sup>4</sup> Department of Urology, Kanazawa University Graduate School of Medical Science, Kanazawa, Japan

<sup>5</sup> Department of Urology, Osaka University Graduate School of Medicine, Osaka, Japan

<sup>6</sup> Department of Urology, Nagasaki University, Nagasaki, Japan

<sup>7</sup> University Department of Growth and Reproduction, Rigshospitalet, DK-2400 Copenhagen, Denmark

<sup>8</sup> Departments of Physiology and Paediatrics, University of Turku, FI-20520 Turku, Finland

**Correspondence:**

Professor Teruaki Iwamoto

Division of Male Infertility, Centre for Infertility and IVF, International University of Health and Welfare Hospital, Nasushiobara, 329-2763, Japan

Tel: +81 287 37 2221

Fax: +81 287 39 3001

Email: t4iwa@iuhw.ac.jp

**Key words:**

Semen quality, reproductive hormones, young men

**Word count:**

Abstract: 244

Main text: 3630

**Subject heading:**

Semen quality and reproductive hormones in Japanese young men.

**ARTICLE SUMMARY****Article focus:**

- There has only been one Japanese study reporting semen quality of presumably normal young men indicating good semen quality compared with men from Europe.
- To establish the frequency of impaired semen quality among normal young Japanese men.

**Key messages:**

- Semen quality of the young men was significantly poorer than that of partners of pregnant women, and 32% may have reduced fertility chances.
- Semen quality was highly variable.
- These results will serve as a reference for future studies on time trends in semen quality in Japan and for comparison with future studies of university students in other countries.

**Strengths and limitations:**

- Large-scale prospective study of semen quality among Japanese young men.
- Standardised inclusion criteria and investigation procedures.
- Lack of influence of ethnicity and genetic background on semen quality.
- Relatively low participation rate limits the possibility to generalize the results for the whole population, which is the common problem for all semen studies

**ABSTRACT**

**Objectives:** To provide information of semen quality among normal young Japanese men and indicate the frequency of reduced semen quality.

**Design:** Cross-sectional, coordinated studies of Japanese young men included from university areas. The men had to be 18 to 24 years, and both the man and his mother had to be born in Japan. Background information was obtained from questionnaires. Standardized and quality controlled semen analyses were performed, reproductive hormones analysed centrally and results adjusted for confounding factors.

**Setting:** Four study centres in Japan (Kawasaki, Osaka, Kanazawa and Nagasaki).

**Participants:** 1,559 men, median age 21.1 years, included during 1999-2003.

**Outcome measures:** Semen volume, sperm concentration, total sperm count, sperm motility, sperm morphology and reproductive hormone levels.

**Results:** Median sperm concentration was 59 (95% confidence interval 52-68) million/mL, and 9.0% and 31.9% had less than 15 and 40 million/mL, respectively. Median percentage of morphologically normal spermatozoa was 9.6 (8.8-10.3) %. Small but statistically significant differences were detected for both semen and reproductive hormone variables between men from the four cities. Overall, the semen values were lower than those of a reference population of 792 fertile Japanese men.

**Conclusions:** Assuming the investigated men were representative for young Japanese men, a significant proportion of the population had suboptimal semen quality with reduced fertility potential, and as a group they had lower semen quality than fertile men. However, the definitive role – if any - of low semen quality for subfertility and low fertility rates remains to be investigated.

## INTRODUCTION

Whether there has been a global decreasing trend in semen quality remains still controversial. In contrast, there is a consensus that regional differences exist.<sup>1-7</sup> Cross-sectional, coordinated studies of young men from the general populations have shown that men from the Western part of the Northern European countries have lower semen quality than men from the Eastern part or men from Southern Spain,<sup>4-8</sup> which is inversely correlated with the testicular cancer incidences.<sup>8,9</sup>

There has only been one Japanese study reporting semen quality of presumably normal young men<sup>10</sup> indicating good semen quality compared with men from Europe. However, the authors concluded that their results might be flawed by a selection bias and lack of ability to account for confounding factors, and they requested well-designed prospective studies to be performed in several regions of Japan.

Here, we present the results of prospectively designed, cross-sectional studies of young university students from four different provinces in Japan. Our objectives were to elucidate if reduced semen quality were frequent among Japanese men unselected for their fertility status, to examine possible regional differences, to provide a reference for future studies on time trends in semen quality, and to compare the results with those obtained in other countries.

## METHODS

The investigations took place at four study centres based in departments of urology at university hospitals in Kawasaki, Osaka, Kanazawa and Nagasaki in Japan. The investigation procedures described below were the same as those of the previously published European studies<sup>4,5,7</sup> except for the selection of study populations and assessment of semen volume.

### Study populations of young men

University students were informed about the study through posters placed in several conspicuous places on the campuses of the universities connected to the four study centres.

1  
2  
3  
4  
5  
6  
7  
8  
9  
10  
11  
12  
13  
14  
15  
16  
17  
18  
19  
20  
21  
22  
23  
24  
25  
26  
27  
28  
29  
30  
31  
32  
33  
34  
35  
36  
37  
38  
39  
40  
41  
42  
43  
44  
45  
46  
47  
48  
49  
50  
51  
52  
53  
54  
55  
56  
57  
58  
59  
60

Serially numbered leaflets giving detailed information about the study were attached to the posters. A candidate volunteer had to call the study centre, inform the serial number printed on his copy of the leaflet to make an appointment for the investigations approximately one week later, and to receive a package of documents within days by mail. The package included further written information, a questionnaire and the instruction to preferably abstain from ejaculation for at least 48 hours prior to producing the semen sample for the study. Further inclusion criteria were that the man was 18-24 years, and that both he and his mother were born in Japan. Failure to comply with the request for ejaculation abstinence period was not a reason for exclusion, but the abstinence time was recorded according to the information given by the study subjects at the time of the semen sample delivery. On the day of attendance that was set at a certain time in the morning, the man returned the completed questionnaire, underwent a physical examination, provided a semen sample and had a blood sample drawn.

The study in Kawasaki covered two separate periods: May 1999 to ~~April-May~~ 2000 and April 2002 to May 2003, and the study periods in Osaka, Kanazawa, and Nagasaki were September 2002 to October 2003, July 2002 to June 2003, and July 2002 to July 2003, respectively. In total 9,374 leaflets were taken by the students and 1,559 (16.6%) participated; 14.5% (658/4,534) from Kawasaki, 11.7% (300/2,570) from Osaka, 21.9% (300/1,371) from Kanazawa, and 33.3% (301/899) from Nagasaki.

[The healthy subgroup \(n=1,307\) of the entire study population \(n=1,559\), who had no history of cryptorchidism, testicular torsion, orchitis, varicocele, inguinal hernia, caused pregnancy, and experienced fertility problem, was examined separately \(Supplemental Table 1\).](#)

#### Questionnaires

The questionnaire included information on age and previous or current diseases, including any known history of fertility. To assure the quality of the information regarding previous

1  
2  
3  
4  
5  
6  
7  
8 conditions the men were asked to fill in the questionnaire – if possible – in collaboration with  
9 their parents.  
10

### 11 **Physical examination**

12 The participants had their testes size measured by use of a Prader orchidometer  
13 (Pharmacia & Upjohn, Copenhagen, Denmark). The presence of varicocele or other scrotal  
14 abnormalities and the Tanner stage of pubic hair were evaluated. Body weight and height  
15 were self-reported, and body mass index (BMI) was calculated as weight in kilograms di-  
16 vided by squared height in meters.  
17  
18  
19  
20  
21  
22  
23

### 24 **Semen samples**

25 The ejaculation abstinence period was calculated as the time between the current and pre-  
26 vious ejaculation based on self-reported information from the men. Semen samples were  
27 collected at the laboratory and kept at 37°C during liquefaction. Semen volume was as-  
28 sessed by aspirating the entire sample into a graduated 5ml syringe (TERUMO, Tokyo).  
29 Sperm motility was assessed on 10 µl of well-mixed semen placed on a clean glass slide,  
30 covered with a 22x22 mm coverslip, and then examined at a total magnification of 400 times  
31 on the heating stage at 37°C of a microscope. The sperm were classified as either motile  
32 (WHO motility classes A, B or C) or immotile (class D), in order to record the proportion of  
33 motile sperm.<sup>11</sup> The motility assessment was repeated on a second 10 µl aliquot of semen,  
34 and the average value of the two samples was calculated. For the assessment of sperm  
35 concentration the samples were diluted in a solution of 0.6 mol/L NaHCO<sub>3</sub> and 0.4% (v/v)  
36 formaldehyde in distilled water, subsequently assessed using Bürker-Türk haemocytome-  
37 ters. Only sperm with tails were counted. Smears were prepared for morphological evalua-  
38 tion, Papanicolaou stained and finally assessed according to strict criteria<sup>12</sup> by one examiner  
39 (MV) in Finland between 2009 and 2010.  
40  
41  
42  
43  
44  
45  
46  
47  
48  
49  
50  
51  
52  
53  
54  
55  
56  
57  
58  
59  
60

### Quality control of sperm concentration assessment

Inter-laboratory variation in assessment of sperm concentration was monitored by an external quality control (QC) programme coordinated by the Department of Growth and Reproduction Copenhagen, Denmark<sup>3 4</sup> during the study period.

### Blood samples

A blood sample was drawn from a cubital vein of each participant usually in the morning to reduce the effect of diurnal variation in hormone levels, and the serum was separated by centrifugation after clotting and stored at  $-20^{\circ}\text{C}$ . The frozen serum was sent to the Department of Growth and Reproduction, Rigshospitalet, in Copenhagen, Denmark for a centralised hormone analysis. Levels of testosterone, FSH, LH and sex hormone-binding globulin (SHBG) were determined using a time-resolved immunofluorometric assay (Delfia, Wallac, Turku, Finland). Inhibin-B was measured by a specific two-sided enzyme immuno-metric assay (Serotec, UK). Intra- and inter-assay coefficients of variations (CV) for measurements of both FSH and LH were 3% and 4.5%, respectively. CVs for both testosterone and SHBG were <8% and <5%, respectively. The intra- and inter-assay CVs for inhibin-B were 15% and 18%. Free testosterone (cFT) was calculated from total testosterone and SHBG using fixed albumin level of 43.8 g/L as described by Vermeulen.<sup>13</sup>

### Comparison population: Fertile men (partners of pregnant women)

From January 1999 to February 2002, our group also examined the semen quality of 792 fertile men (partners of pregnant women) (a manuscript describing these have been submitted in parallel). Participation of these men was similar to that of current study population of young men: they answered a questionnaire, delivered a semen sample, and had a physical examination performed. The results of their semen analyses were used for comparison to that of the young men.



### Statistical analysis

Standard statistics (mean, median, standard deviation (SD), 5-95 percentiles and frequencies) were used for description (Tables 1-3). Between-group differences for continuous variables giving the basic description of the study population were tested by the non-parametric Kruskal-Wallis test. Between-group differences for categorical variables were tested with the Fisher's exact test.

The main outcome variables were the assessed semen and hormone variables, and the between group differences were tested by multiple linear regression (Tables 2 and 3). Semen volume, sperm concentration and total sperm counts were best normalised by cubic root transformation before analysis to correct for skewed distribution of residuals. The percentages of motile spermatozoa were logit-transformed. Percentages of morphologically normal spermatozoa entered the model untransformed. Ejaculation abstinence up to 96 hours had a linear increasing effect and abstinence above 96 hours a slight, but significant non-linear increasing effect on semen volume, sperm concentrations and total sperm counts. Abstinence therefore entered the model as a covariate as linear splines and abstinence-squared for the part above 96 hours. For motility, winter season was associated with lower motility percentages and season was therefore included as a covariate. For all semen variables increasing age tended to be slightly, but negatively associated with semen variables and age was also included in the models. Duration from ejaculation to assessment was additionally evaluated as a confounder for motility, but found to be non-significant, and therefore not included.

Natural logarithmic transformation gave models in which differences between centres and effects of covariates are more easily interpretable. This alternative model approximate closely the model obtained by cubic root transformation and is used when reporting adjusted semen volumes, sperm concentrations and total sperm counts to represent a 21-year-old man having an ejaculation abstinence period of 96 hours. QC results did not show any significant inter-laboratory differences, changes during the study period or difference to the

1  
2  
3  
4  
5  
6  
7  
8  
9  
10  
11  
12  
13  
14  
15  
16  
17  
18  
19  
20  
21  
22  
23  
24  
25  
26  
27  
28  
29  
30  
31  
32  
33  
34  
35  
36  
37  
38  
39  
40  
41  
42  
43  
44  
45  
46  
47  
48  
49  
50  
51  
52  
53  
54  
55  
56  
57  
58  
59  
60

reference laboratory. Therefore, corrections of data were not needed to make them comparable. The logit-transformed motility data and untransformed morphology percentages were used to give adjusted levels for a 21-years-old man for these variables.

Differences with  $p < 0.05$  were considered statistically significant. All statistical analyses were done twice: MNM using SAS version 9.1.3 (SAS Institute Inc., Cary, NC, USA) and NJ using PASW version 18.

## RESULTS

A description of the study population is summarized in Table 1. Few men had caused a pregnancy or experienced infertility problems, in total 4.7%. During the preceding 3 months to participation in the study, 10.4% had used medications which were mainly antibiotics, painkillers, asthma or allergy medicines.

Semen results are shown in Table 2. "Observed" values are based on raw data, and "Adjusted" are the estimates from regression analyses taking covariates into account. Sperm concentrations did not differ between men from the four study centres, whereas the semen volume for men from Kanazawa was higher than in other centres ( $p < 0.0001-0.02$  in pair-wise comparisons). Consequently, also total sperm counts were higher for these men, but only significantly in the pair-wise comparison with men from Kawasaki ( $p < 0.02$ ). The percentages of motile spermatozoa differed significantly, because men from Nagasaki had higher frequencies of motile spermatozoa than men from other centres (adjusted medians 64-75%). The percentage of morphologically normal spermatozoa for men from Nagasaki was higher than that from Osaka ( $p < 0.0001$  in pair-wise comparison). [These results were very similar to those from the healthy subgroup of young men \(n=1,307: Supplemental Table 1\) who had no history of reproductive problems, i.e. cryptorchidism, testicular torsion, orchitis, varicocele, inguinal hernia, STD, caused pregnancy, and experienced fertility problem.](#)

Cumulated, 2.2% of men had a sperm concentration below 5 million/mL, 4.9% below 10 million/mL, 9.0% below 15 million/mL and 31.9% below 40 million/mL. For morphology 5.7% of men had normal spermatozoa below 5%. Figure 1 summarizes the distribution of

1  
2  
3  
4  
5  
6  
7  
8 the sperm concentration, total sperm counts, percentages and total numbers of morpho-  
9 logically normal spermatozoa.

10  
11 Figure 1 summarises the semen results of the young men in comparison to that of  
12 the 792 fertile men. The semen variables differed between these groups, with fertile men  
13 having higher semen volume ( $p < 0.002$ ), sperm concentration ( $p < 0.0001$ ), total sperm count  
14 ( $p < 0.0001$ ), total number of morphologically normal spermatozoa ( $p < 0.0001$ ) ~~than young~~  
15 ~~men, while~~ and the percentage of normal spermatozoa ~~did not differ between the groups~~  
16 ( $p = 0.05$ ) ~~than young men.~~

17  
18  
19  
20  
21  
22 The semen variables of men whose mothers had smoked during pregnancy did not  
23 significantly differ from non-exposed men, but the number of smoking mother was very small.  
24 The men's own smoking or drinking habits (not shown in Table), previous experience of  
25 cryptorchidism, testicular torsion, orchitis, sexually transmitted diseases (chlamydia, gon-  
26 norrhoea or epididymitis) or previous fertility experience did not affect their semen variables.

27  
28  
29  
30  
31 Reproductive hormone levels differed between the groups of young men (Table 3).  
32 Men from Kawasaki and Osaka had slightly higher FSH ( $p < 0.0001-0.049$ ) and inhibin-B  
33 ( $p < 0.003-0.01$ ) levels than men from Kanazawa and Nagasaki. A similar pattern was seen  
34 for total testosterone (all  $p < 0.0001$ ), SHBG (all  $p < 0.0001$ ) and cFT (all  $p < 0.0001$ ). The  
35 number of men with high (mean+2SD) gonadotropin levels was very small (1-4 men for FSH  
36 0.3-1.3%, and 2-14 for LH 0.7-4.7%). T/LH ratio of men from Kawasaki, Osaka, Kanazawa,  
37 and Nagawaki were 9.74±4.26, 8.75±3.54, 8.36±3.76, and 7.45±3.51, respectively. All  
38 pair-wise comparisons between centres except Osaka vs. Nagasaki were statistically  
39 significant ( $p < 0.0001-0.01$ ).

40  
41  
42  
43  
44  
45 For the entire group of men the median (5-95 percentiles) sizes of the left and right  
46 testes were both 22 ml (14-28 ml). The average testis size (mean of left and right) differed  
47 significantly between the study groups, ranging from 19 to 23 ml in medians (Table 1).  
48 Overall 98.8% of study subjects had a pubic hair distribution of Tanner stage 4 or higher:  
49 Kawasaki 98.2%, Osaka 98.0%, Kanazawa 100% and Nagasaki 99.7%.

1  
2  
3  
4  
5  
6  
7  
8  
9  
10  
11  
12  
13  
14  
15  
16  
17  
18  
19  
20  
21  
22  
23  
24  
25  
26  
27  
28  
29  
30  
31  
32  
33  
34  
35  
36  
37  
38  
39  
40  
41  
42  
43  
44  
45  
46  
47  
48  
49  
50  
51  
52  
53  
54  
55  
56  
57  
58  
59  
60

During the physical examination 27.1% of men was diagnosed with a varicocele; 14.3% stage 1, 9.1% stage 2, and 3.7% stage 3. Varicocele was on the left side [only in 26.5% and on the right in 3.5% of men. In 9 men \(0.6% of the entire study population\) the right varicocele was not concomitant with a left one23.6%, both sides in 2.9% and only on the right side in 0.6% of men.](#) The presence of a varicocele was non-significantly associated with an 8% (95% confidence interval -20%;+6%) reduction in sperm concentration and 11% decline (-23%;+4%) in total sperm count. No tendencies could be detected for sperm motility or morphology. Inhibin-B and total testosterone tended to be lower in men having a varicocele, however, non-significantly ( $p>0.05$ ).

## DISCUSSION

Sperm concentration, total sperm count, percentage of morphologically normal spermatozoa and percentage of motile spermatozoa varied tremendously between individual participants. However, only small but statistically significant differences were detected for both semen and reproductive hormone levels between young men from the four provinces in Japan. Thus, from a biological point of view these groups of men can be regarded as similar. [The most important finding is thatAs expected,](#) semen quality of the young men was significantly poorer than that of partners of pregnant women.

To our knowledge, this is the first large-scale prospectively designed study to explore potential differences in testicular function parameters in Japanese men that were not selected by any fertility status. The men were enrolled by the same type of advertisement. They were all university students. We tested for effects of various covariates and accounted for these when necessary. Thus, the comparison between the four groups is valid, and the results may serve as a reference for future studies on time trends in semen quality.

In Japan, there is not a compulsory medical examination of young men as in the Northern-European countries,<sup>4,7</sup> which makes it difficult to recruit men that are representative for the general population. Itoh *et al*<sup>10</sup> detected a median sperm concentration of 81 million/mL in 207 young men (18-22 years old) examined in 1998 in Sapporo but also con-

cluded that selection bias in the recruitment and variable ejaculation abstinence might have affected the results. In the design of our study, we therefore decided to restrict the invitation to university students to get a well-characterized study population. Men who have experienced fertility problems may be more likely to volunteer for semen studies than men without any problems.<sup>14</sup> [Since the sperm count cannot be known without laboratory analysis, it is unlikely that any of the volunteers would have had such information. Testicular size might hint to fertility problem if it were very small. However, there was only small difference \(slightly larger in the present cohort\) between the testicular size of the young and the fertile men<sup>15</sup> in Japan. Moreover, semen variables of the healthy subgroup of young men \(n=1,307\) who had no history of reproductive problems were very similar to those of the entire study population \(n=1,559\). Likewise, it should be noted that the incidence of cryptorchidism was considerably high, which could be an indicator of recruitment bias. In the present study, however, it is unlikely to be a recruitment bias, because the information about cryptorchidism was based on the questionnaire data, i.e. history of cryptorchidism, not current cryptorchidism. This included cryptorchidism at any time, i.e. both congenital and acquired, which may have different causes and consequences. In fact, there were no differences in semen quality between the healthy subgroup of young men \(Supplemental Table 1\) and the entire study population \(Table 2\) including the men with history of cryptorchidism or other reproductive problems.](#) We restricted the age of participants to 18-24 years assuming that the majority in such a group would not yet have any direct knowledge about their own fertility chances, since the average Japanese man fathers his first child at the age of 31.8 years.<sup>16-18</sup> Less than 1% of the participants had experienced fertility problems, and such problems are therefore unlikely to severely bias the obtained results. Poorly educated men may be more likely to refuse participation in studies that require delivery of semen samples.<sup>16-17</sup> However, higher educational level has been positively associated with semen quality.<sup>16-17-18</sup> Thus, the selection of university students may bias the results towards a higher level. [Nevertheless, semen variables of the healthy subgroup of young men \(Supplemental Table 1\) who had no history of reproductive problems were very similar to those](#)

1  
2  
3  
4  
5  
6  
7  
8  
9  
10  
11  
12  
13  
14  
15  
16  
17  
18  
19  
20  
21  
22  
23  
24  
25  
26  
27  
28  
29  
30  
31  
32  
33  
34  
35  
36  
37  
38  
39  
40  
41  
42  
43  
44  
45  
46  
47  
48  
49  
50  
51  
52  
53  
54  
55  
56  
57  
58  
59  
60

[of the entire study population \(Table 2\). We thus considered that semen results of the present study population was unlikely to have been subjected to a significant bias.](#)

There were small differences in inhibin-B levels that were lower in men from Kanazawa and Nagasaki than in men from Kawasaki and Osaka. Similar trends were detected for total testosterone, SHBG, and cFT. The slightly higher inhibin-B levels in men from Kawasaki and Osaka could theoretically indicate a higher spermatogenic activity in these, which however does not fit with the sperm count findings. Also, we hesitate to draw such a conclusion since the detected inhibin-B concentrations at this level do not correlate strongly with sperm counts.<sup>48-49</sup> We have no explanation for the higher total testosterone in men from Kawasaki and Osaka compared to other centres. It is important to keep in mind that the adjusted hormone levels in Table 3 were adjusted for the effect of BMI, which thus does not explain the findings. [T/LH ratio may inform about Leydig cell function, and therefore we also analysed it. Variation between the study centres was small but statistically significant; however, biological significance of variation in this scale is questionable.](#)

Diagnostic accuracy of varicocele is very dependent on the clinical experience of the investigator. The high frequency of varicocele may reflect this, since the majority of the cases were grade 1. We saw no significant negative effect on semen quality, which however, is likely due to the low grade in most varicoceles.

In the European studies semen volume was assessed by weighing which now is the "gold standard", because aspiration – as used in our study – underestimates the volume by approximately 0.4 mL.<sup>49 20 21</sup> Thus, the true median semen volume might have been 3.4 mL, which is closer to the volumes reported from Finland, Denmark, Germany, and Spain,<sup>3 7 8</sup> and thus the adjusted median total sperm count in our study would have been 200 million rather than 177. Inter-observer variation may explain the higher semen volume detected in men from Kanazawa compared to other centres, because volume measurements were not under external quality control.

Three Chinese studies have described semen qualities in apparently normal men. Healthy men, 20-60 years of age, had a median sperm concentration and total sperm count

1  
2  
3  
4  
5  
6  
7  
8  
9 of approximately 65 million/mL and 154 million, respectively.<sup>224</sup> The youngest age group,  
10 20-25 years old, comprised only 6.1% of the study population, and overall 83% had previ-  
11 ously fathered a child. Another study investigated 20-40 years old men but excluded those  
12 with known andrological diseases and reported a median sperm concentration and total  
13 sperm count of 78 million/mL and 168 million.<sup>232</sup> Junqing *et al*<sup>243</sup> detected a mean sperm  
14 concentration and total sperm count of 55 million/mL and 124 million, respectively, in 22-30  
15 years old men that underwent a premarital physical examination. Thus, the latter may be  
16 more comparable to ours, since the men presumably had little knowledge of their fertility  
17 potential. These Chinese reference values are clearly lower than the current Japanese fig-  
18 ures, suggesting that there are regional differences in semen quality among Asian men.  
19 Interestingly, Chinese men who had at least a college education had lower sperm counts  
20 than men with a lower educational status.<sup>243</sup> If this were true also for Japanese men, the  
21 difference in semen quality between Japanese and Chinese men would be even greater  
22 than what is evident from the present results.  
23  
24  
25  
26  
27  
28  
29  
30  
31

32 Other studies have shown an adverse effect of maternal smoking during pregnancy  
33 on the son's semen quality.<sup>254-276</sup> However, we did not find such an effect, probably because  
34 the number of smoking mothers was very small. [By contrast, the smoking rates of the young  
35 men themselves looks exceedingly high for a developed nation, but this is a common trend  
36 in Japanese male, which is consistent with the figures from National Health and Nutrition  
37 Survey \(47.4% in total and 60.8% in 20-29 age group in 2000\)<sup>28</sup>, as well as the results from  
38 the previous our study of the fertile Japanese men \(52.8% in total\).<sup>15</sup>](#)  
39  
40  
41  
42  
43

44 The Japanese men appeared to have higher sperm counts than men from the North-  
45 ern Europe<sup>4 5 7 27-3029-32</sup> but slightly lower than men from Spain.<sup>8</sup> Thus, Japanese men may  
46 be ranked as having better sperm counts than many populations of European young men.  
47 Nevertheless, this does not imply that impaired semen quality is not a problem among  
48 young Japanese men. Nearly 10% had sperm counts below the current WHO reference  
49 levels of 15 million/mL or 39 million<sup>3230</sup> rendering them for high risk of reduced fertility in the  
50 future. Nearly one third of men had sperm concentration less than 40 million/mL, indicating  
51  
52  
53  
54  
55

1  
2  
3  
4  
5  
6  
7  
8 reduced fecundity.<sup>32-3534-37</sup> We are therefore concerned that a significant proportion of the  
9 men may experience problems when they reach the ages when they want to repro-  
10 duce.<sup>32-3534-37</sup>  
11  
12

13 Our prospectively designed study showed no overall difference between men from the  
14 four investigation sites, and the semen results were similar to those previously reported for  
15 Finnish men that until now have been considered to have the best semen quality among  
16 young men from the Northern Europe. The study cohorts were, however, not completely  
17 comparable. The recently detected adverse trends in semen quality and testis cancer inci-  
18 dences among men from Finland suggest underlying environmental causes.<sup>320</sup> Whether the  
19 semen quality of Japanese men has changed over the years cannot be answered by our  
20 current study, but a large proportion of investigated men were shown to have sub-optimal  
21 sperm counts. These results will serve as a reference for future studies on time trends in  
22 semen quality in Japan and for comparison with future studies of university students in other  
23 countries.  
24  
25  
26  
27  
28  
29  
30  
31  
32  
33  
34  
35  
36  
37  
38  
39  
40  
41  
42  
43  
44  
45  
46  
47  
48  
49  
50  
51  
52  
53  
54  
55  
56  
57  
58  
59  
60



1  
2  
3  
4  
5  
6  
7  
8  
9  
10  
11  
12  
13  
14  
15  
16  
17  
18  
19  
20  
21  
22  
23  
24  
25  
26  
27  
28  
29  
30  
31  
32  
33  
34  
35  
36  
37  
38  
39  
40  
41  
42  
43  
44  
45  
46  
47  
48  
49

Table 1: Physical appearance and self-reported information of young men from four cities in Japan.

|                                               | Entire study population (n=1559) |                      | Kawasaki (n=658) |                      | Osaka (n=300) |                      | Kanazawa (n=300) |                      | Nagasaki (n=301) |                      | p-values             |
|-----------------------------------------------|----------------------------------|----------------------|------------------|----------------------|---------------|----------------------|------------------|----------------------|------------------|----------------------|----------------------|
|                                               | Mean (SD)                        | Median (5-95)        | Mean (SD)        | Median (5-95)        | Mean (SD)     | Median (5-95)        | Mean (SD)        | Median (5-95)        | Mean (SD)        | Median (5-95)        |                      |
| Height (cms)                                  | 172 (6)                          | 172 (163-181)        | 172 (6)          | 172 (163-182)        | 172 (6)       | 172 (163-181)        | 173 (6)          | 173 (163-181)        | 172 (5)          | 171 (163-180)        | 0.01 <sup>A</sup>    |
| Weight (kgs)                                  | 64 (9)                           | 63 (52-79)           | 64 (11)          | 63 (52-80)           | 63 (8)        | 63 (52-77)           | 64 (8)           | 63 (52-80)           | 63 (9)           | 62 (52-82)           | 0.4 <sup>A</sup>     |
| BMI (kg/m2)                                   | 21.4 (2.7)                       | 21.0 (18.2-26.0)     | 21.5 (3.0)       | 21.0 (18.2-26.0)     | 21.2 (2.2)    | 20.9 (18.2-25.4)     | 21.4 (2.4)       | 21.1 (18.4-25.8)     | 21.6 (2.6)       | 21.3 (18.0-26.2)     | 0.2 <sup>A</sup>     |
| Mean of left and right size (ml) <sup>a</sup> | 21 (4)                           | 22 (14-28)           | 22 (4)           | 22 (15-28)           | 22 (5)        | 23 (14-29)           | 21 (4)           | 21 (14-29)           | 20 (4)           | 19 (13-26)           | <0.0001 <sup>A</sup> |
| Age (years) <sup>b</sup>                      | 21.3 (1.6)                       | 21.1 (18.9-24.1)     | 20.8 (1.4)       | 20.7 (18.7-23.4)     | 21.7 (1.6)    | 21.6 (19.3-24.4)     | 21.8 (1.6)       | 21.9 (18.9-24.2)     | 21.3 (1.7)       | 21.2 (18.9-24.2)     | <0.0001 <sup>A</sup> |
| School education (years) <sup>c</sup>         | 15 (2)                           | 15 (12-18)           | 14 (2)           | 14 (12-17)           | 15 (2)        | 15 (12-18)           | 15 (2)           | 15 (12-18)           | 15 (2)           | 15 (12-18)           | <0.0001 <sup>A</sup> |
| Ejaculation abstinence (hours) <sup>d</sup>   | 78 (36)                          | 65 (50-136)          | 76 (32)          | 64 (49-136)          | 77 (35)       | 64 (50-136)          | 82(51)           | 67 (51-138)          | 78 (28)          | 66 (51-136)          | 0.0002 <sup>A</sup>  |
|                                               |                                  | <b>Frequency (%)</b> |                  | <b>Frequency (%)</b> |               | <b>Frequency (%)</b> |                  | <b>Frequency (%)</b> |                  | <b>Frequency (%)</b> |                      |
| Have (had)                                    |                                  |                      |                  |                      |               |                      |                  |                      |                  |                      |                      |
| Cryptorchidism <sup>e</sup>                   |                                  | 8.2                  |                  | 6.9                  |               | 8.3                  |                  | 12.7                 |                  | 6.3                  | 0.02 <sup>B</sup>    |
| Testicular torsion                            |                                  | 0.1                  |                  | 0.2                  |               | 0.0                  |                  | 0.3                  |                  | 0.0                  | 0.5 <sup>B</sup>     |
| Orchitis                                      |                                  | 1.4                  |                  | 1.6                  |               | 1.7                  |                  | 1.0                  |                  | 1.0                  | 0.8 <sup>B</sup>     |
| Varicocele                                    |                                  | 0.1                  |                  | 0.0                  |               | 0.3                  |                  | 0.3                  |                  | 0.0                  | 0.2 <sup>B</sup>     |
| Inguinal hernia                               |                                  | 1.1                  |                  | 0.7                  |               | 2.3                  |                  | 1.0                  |                  | 1.0                  | 0.2 <sup>B</sup>     |
| STD <sup>f</sup>                              |                                  | 2.1                  |                  | 2.8                  |               | 1.0                  |                  | 1.3                  |                  | 2.3                  | 0.3 <sup>B</sup>     |
| Thyroid disease or diabetes                   |                                  | 0.1                  |                  | 0.2                  |               | 0.3                  |                  | 0.0                  |                  | 0.0                  | 0.7 <sup>B</sup>     |
| Taken medicine <sup>g</sup>                   |                                  | 10.4                 |                  | 13.7                 |               | 8.0                  |                  | 8.7                  |                  | 7.3                  | 0.0006 <sup>B</sup>  |
| Caused pregnancy                              |                                  | 3.8                  |                  | 4.4                  |               | 2.7                  |                  | 3.3                  |                  | 4.0                  | 0.6 <sup>B</sup>     |
| Experienced fertility problem <sup>h</sup>    |                                  | 0.9                  |                  | 1.8                  |               | 0.3                  |                  | 0.0                  |                  | 0.7                  | 0.03 <sup>B</sup>    |
| Varicocele diagnosed in study <sup>i</sup>    |                                  | 27.1                 |                  | 26.8                 |               | 24.3                 |                  | 20.0                 |                  | 37.5                 | <0.0001 <sup>B</sup> |
| Tobacco smoker                                |                                  | 49.6                 |                  | 62.4                 |               | 34.6                 |                  | 42.8                 |                  | 45.0                 | <0.0001 <sup>B</sup> |
| Exposed to tobacco in utero <sup>j</sup>      |                                  | 2.0                  |                  | 2.5                  |               | 1.3                  |                  | 1.3                  |                  | 2.3                  | 0.6 <sup>B</sup>     |

SD: Standard deviation.

(5-95): 5-95th percentile.

a: Size assessed by palpation. Two men had non-palpable left testicles, one from Kawasaki and one from Kanazawa due to previous orchidectomy because of testicular torsion.

b: Age calculated as difference between day of attendance in study and self-reported day of birth.

c: All participants were university students.

d: Ejaculation abstinence period calculated as difference between time of current ejaculation and self-reported time of previous ejaculation.

e: Not born with both testicles in scrotum (irrespective of spontaneous descent or treatment).

f: Diagnosed with epididymitis, chlamydia or gonorrhoea.

g: Taken any medication recent 3 months prior to participation in study. For 93%, 61%, 61% and 60% from Kawasaki, Osaka, Kanazawa and Nagasaki, respectively it was against either infection, allergy or pain.

h: Have had unprotected intercourse without causing a pregnancy during a 12 months period.

i: Varicocele diagnosed during this study, irrespective of previous self-reported information.

j: In utero exposed to maternal tobacco smoking.

A: Kruskal-Wallis test

B: Fisher's exact test

**Table 2:** Semen quality of young men from four cities in Japan.

|                                                           | Observed   |               | Adjusted         |
|-----------------------------------------------------------|------------|---------------|------------------|
|                                                           | Mean (SD)  | Median (5-95) | Median (95%CI)   |
| <b>Semen volume (ml)</b>                                  |            |               |                  |
| Entire study population                                   | 2.9 (1.4)  | 2.7 (1.0-5.5) | 3.0 (2.8-3.2)    |
| Kawasaki                                                  | 2.7 (1.3)  | 2.5 (0.9-5.2) | 2.8 (2.7-3.2)    |
| Osaka                                                     | 2.9 (1.4)  | 2.7 (1.0-5.6) | 2.9 (2.7-3.2)    |
| Kanazawa                                                  | 3.3 (1.5)  | 3.0 (1.2-6.4) | 3.3 (3.1-3.6)    |
| Nagasaki                                                  | 2.9 (1.4)  | 2.8 (0.9-5.4) | 3.0 (2.8-3.2)    |
| p-value                                                   |            |               | p=0.0006         |
| <b>Sperm concentration (mill/ml)</b>                      |            |               |                  |
| Entire study population                                   | 73 (58)    | 59 (10-185)   | 59 (52-68)       |
| Kawasaki                                                  | 71 (61)    | 55 (9-185)    | 57 (48-66)       |
| Osaka                                                     | 75 (61)    | 60 (9-195)    | 61 (50-74)       |
| Kanazawa                                                  | 72 (55)    | 60 (7-183)    | 61 (51-73)       |
| Nagasaki                                                  | 76 (54)    | 64 (12-181)   | 61 (51-74)       |
| p-value                                                   |            |               | p=0.138          |
| <b>Total sperm count (mill)</b>                           |            |               |                  |
| Entire study population                                   | 201 (183)  | 159 (18-509)  | 177 (153-206)    |
| Kawasaki                                                  | 185 (193)  | 143 (17-472)  | 161 (135-191)    |
| Osaka                                                     | 202 (178)  | 163 (28-508)  | 179 (146-221)    |
| Kanazawa                                                  | 228 (184)  | 185 (15-546)  | 201 (165-246)    |
| Nagasaki                                                  | 201 (161)  | 166 (22-531)  | 183 (150-224)    |
| p-value                                                   |            |               | p=0.002          |
| <b>Motile spermatozoa (%)</b>                             |            |               |                  |
| Entire study population                                   | 67 (14)    | 69 (42-88)    | 67 (65-69)       |
| Kawasaki                                                  | 66 (14)    | 68 (40-87)    | 65 (62-67)       |
| Osaka                                                     | 67 (12)    | 67 (52-84)    | 64 (61-67)       |
| Kanazawa                                                  | 62 (14)    | 64 (38-82)    | 60 (57-63)       |
| Nagasaki                                                  | 76 (14)    | 78 (48-93)    | 75 (73-78)       |
| p-value                                                   |            |               | p<0.0001         |
| <b>Morphologically normal spermatozoa (%)<sup>a</sup></b> |            |               |                  |
| Entire study population                                   | 10.3 (6.0) | 9 (2.5-21.5)  | 9.9 (8.8-10.9)   |
| Kawasaki                                                  | 10.5 (6.2) | 9 (2.5-23)    | 9.3 (7.9-10.6)   |
| Osaka                                                     | 9.2 (5.2)  | 8.5 (2.5-19)  | 8.5 (7.2-9.8)    |
| Kanazawa                                                  | 10.0 (6.1) | 8.8 (2-21)    | 9.3 (8.0-10.5)   |
| Nagasaki                                                  | 11.7 (6.1) | 11 (3-23)     | 11.2 (10.0-12.4) |
| p-value                                                   |            |               | p<0.0001         |

**Observed:** Results based on raw data.

**SD:** Standard deviation.

**(5-95):** 5-95th percentile.

**Adjusted median and 95%CI** (confidence interval) calculated by linear regression analysis.

Semen volume, sperm concentration and total sperm counts adjusted to a period of ejaculation abstinence of 96 h for a 21 years-old-man

Motility and morphology adjusted for a 21 years-old-man, winter season

See text for further explanation.

**p-value:** Based on regression analyses of cubic root transformed values, comparing all four groups.

**a:** Morphology results only available for 869 men.

**Table 3:** Reproductive hormone levels of young men from four cities in Japan

|                                  | Observed  |                | Adjusted       |
|----------------------------------|-----------|----------------|----------------|
|                                  | Mean (SD) | Median (5-95)  | Median (95%CI) |
| <b>FSH (U/l)</b>                 |           |                |                |
| Entire study population          | 2.5 (1.3) | 2.2 (1.1-4.9)  | 2.3 (2.2-2.5)  |
| Kawasaki                         | 2.7 (1.3) | 2.4 (1.1-5.2)  | 2.4 (2.3-2.6)  |
| Osaka                            | 2.5 (1.3) | 2.2 (1.1-5.0)  | 2.3 (2.1-2.4)  |
| Kanazawa                         | 2.3 (1.3) | 2.1 (1-4.4)    | 2.1 (1.9-2.3)  |
| Nagasaki                         | 2.3 (1.2) | 2.1 (0.9-4.4)  | 2.1 (1.9-2.2)  |
| p-value                          |           |                | p<0.0001       |
| <b>Inhibin-B (pg/ml)</b>         |           |                |                |
| Entire study population          | 202 (64)  | 197 (110-314)  | 190 (181-199)  |
| Kawasaki                         | 207 (64)  | 202 (113-322)  | 191 (181-201)  |
| Osaka                            | 214 (67)  | 210 (117-336)  | 193 (182-205)  |
| Kanazawa                         | 191 (62)  | 190 (104-304)  | 177 (164-191)  |
| Nagasaki                         | 188 (60)  | 182 (103-286)  | 176 (165-187)  |
| p-value                          |           |                | p=0.003        |
| <b>LH (U/l)</b>                  |           |                |                |
| Entire study population          | 3.2 (1.3) | 2.9 (1.5-5.6)  | 2.7 (2.6-2.9)  |
| Kawasaki                         | 3 (1.3)   | 2.8 (1.4-5.3)  | 2.7 (2.5-2.8)  |
| Osaka                            | 3.5 (1.4) | 3.2 (1.8-6.4)  | 3.0 (2.9-3.2)  |
| Kanazawa                         | 3.3 (1.4) | 3.1 (1.6-5.8)  | 2.8 (2.6-3.1)  |
| Nagasaki                         | 2.9 (1.0) | 2.8 (1.5-4.9)  | 2.6 (2.4-2.8)  |
| p-value                          |           |                | p<0.0001       |
| <b>Testosterone (nmol/l)</b>     |           |                |                |
| Entire study population          | 25 (8)    | 24 (14-39)     | 26 (25-27)     |
| Kawasaki                         | 26 (7)    | 25 (15-39)     | 26 (25-27)     |
| Osaka                            | 27 (9)    | 26 (15-42)     | 27 (26-28)     |
| Kanazawa                         | 22 (7)    | 21 (12-35)     | 23 (21-24)     |
| Nagasaki                         | 22 (7)    | 21 (13-36)     | 23 (21-24)     |
| p-value                          |           |                | p<0.0001       |
| <b>SHBG (nmol/l)</b>             |           |                |                |
| Entire study population          | 28 (11)   | 26 (13-46)     | 27 (26-28)     |
| Kawasaki                         | 30 (11)   | 29 (14-49)     | 28 (27-30)     |
| Osaka                            | 29 (11)   | 27 (14-50)     | 26 (25-28)     |
| Kanazawa                         | 24 (9)    | 23 (12-41)     | 23 (21-24)     |
| Nagasaki                         | 24 (9)    | 23 (12-42)     | 23 (21-24)     |
| p-value                          |           |                | p<0.0001       |
| <b>cFT (pmol/l) <sup>a</sup></b> |           |                |                |
| Entire study population          | 607 (192) | 585 (326-949)  | 638 (613-663)  |
| Kawasaki                         | 619 (181) | 605 (339-924)  | 630 (604-657)  |
| Osaka                            | 672 (214) | 649 (371-1029) | 675 (642-710)  |
| Kanazawa                         | 556 (183) | 527 (298-894)  | 589 (552-628)  |
| Nagasaki                         | 566 (177) | 550 (316-922)  | 583 (552-615)  |
| p-value                          |           |                | p<0.0001       |

**Observed:** Results based on raw data.

**SD:** Standard deviation.

**(5-95):** 5-95th percentile.

**Adjusted median and 95%CI** (confidence interval) calculated by linear regression analysis, adjusted to blood sampling at 10:00 am in winter season, representing of 21 years-old man having a BMI of 21.

**p-value:** Based on regression analyses of natural logarithmic transformed values, comparing all four groups.

**a:** Calculated free-testosterone.

### Ethics

This study got the approval of the Ethics Review Board in each university and hospital. All participants gave their written consent before participating in the study.

### Acknowledgements

Drs. K. Nishimura, H. Miura, M. Yamanaka are acknowledged for performing physical examinations of the young men. Ms K. Ohata, M. Haruki, and M. Okayama are acknowledged for coordinating the recruitment of the young men. Ms M. Nakanome, S. Okabe, K. Takakura, and Y. Kawabuchi are acknowledged for examination of semen quality. And all other technicians and study nurses of the four centres are acknowledged for coordinating the recruitment and for examination of semen quality. All the volunteers participating in the study are thanked. Without their participation the study would not have been possible.

### Funding

This study has been supported economically by several grants: The Ministry of Health and Welfare, Japan (Grant nos. H10-Seikatsu-017 and H13-Seikatsu-014 to TI, AO, MN, and JE). Japan Society for the Promotion of Science (nos. 1113001 and 1214001 to TI) and The JSPS Invitation Fellowship Programme (invited scientist from Denmark, NJ) by Japan Society for the Promotion of Science (ID no. S10110), Rigshospitalet (Grant no. 961506336) to NJ, Academy of Finland, Sigrid Juselius Foundation and Turku University Hospital to JT. The funding organisations played no role in the design and conduct of the study, in collection, management, analysis, and interpretation of the data; or in the presentation, review, or approval of the manuscript.

### Data sharing statement

There is no additional data available.

### Contributor statement

NJ, NES, JT, SN, MNM, MY and TI conceived and designed this study.

Acquisition of data: TI, MY, SN, KY, KB, MN, EK, JK, AO, KM, AT, HK, and JE.

Data analysis was performed by MNM, NJ and TI.

NJ, TI, SN and JT drafted the manuscript.

MV assessed the sperm morphology smears.

JK, EK, MN, KB, KY, AT, KM, AO, JE, HK and TI performed the physical examinations and collected the data.

All authors participated in the interpretation of data.

- Revising the article critically for important intellectual content: All authors.
- Final approval of the version to be published: All authors.

### References

1. Fisch H, Goluboff ET, Olson JH, *et al.* Semen analysis in 1283 men from the United States over a 25-year period: no decline in quality. *Fertil Steril* 1996;**65**:1009-1414.
2. Vierula M, Niemi M, Keiski A, *et al.* High and unchanged sperm counts of Finnish men. *Int J Androl* 1996;**19**:11-7.
3. Jørgensen N, Andersen AG, Eustache F, *et al.* Regional differences in semen quality in Europe. *Hum Reprod* 2001;**16**:1012-9.
4. Jørgensen N, Carlsen E, Neramoen I, *et al.* East-West gradient in semen quality in the Nordic-Baltic area: a study of men from the general population in Denmark, Norway, Estonia and Finland. *Hum Reprod* 2002;**17**:2199-208.

5. Punab M, Zilaitiene B, Jørgensen N, *et al.* Regional differences in semen qualities in the Baltic region. *Int J Androl* 2002;**25**:243-52
6. Swan SH, Brazil C, Drobinis EZ *et al.* Geographic differences in semen quality of fertile US males. *Environ Health Perspect* 2003;111:414-420.
7. Paasch U, Salzbrunn A, Glander HJ, *et al.* Semen quality in sub-fertile range for a significant proportion of young men from the general German population: a co-ordinated, controlled study of 791 men from Hamburg and Leipzig. *Int J Androl* 2008;**31**:93-102.
8. Fernandez MF, Duran I, Olea N, *et al.* Semen quality and reproductive hormone levels in men from southern Spain. *Int J Androl* 2012;**35**:1-10
9. Adami HO, Bergström R, Möhner M, *et al.* Testicular cancer in nine northern European countries. *Int J Cancer* 1994;**59**:33-8.
10. Itoh N, Kayama F, Tatsuki TJ, *et al.* Have sperm counts deteriorated over the past 20 years in healthy, young Japanese men? Results from the Sapporo area. *J Androl* 2001;**22**:40-4.
11. World Health Organization. Laboratory manual for examination of human semen and sperm-cervical mucus interaction. 4th edition, Cambridge, UK, Cambridge University Press, 1992.
12. Menkveld R, Stander FS, *et al.* The evaluation of morphological characteristics of human spermatozoa according to stricter criteria. *Hum Reprod* 1990;5:586-92.
13. Vermeulen A, Verdonck L, Kaufman JM. A critical evaluation of simple methods for the estimation of free testosterone in serum. *J Clin Endocrinol Metab* 1999;84:3666-72.
14. Muller A, De La Rochebrochard E, Labbé-Declèves C, *et al.* Selection bias in semen studies due to self-selection of volunteers. *Hum Reprod* 2004;**19**:2838-44.

1  
2  
3  
4  
5  
6  
7  
8  
9  
10  
11  
12  
13  
14  
15  
16  
17  
18  
19  
20  
21  
22  
23  
24  
25  
26  
27  
28  
29  
30  
31  
32  
33  
34  
35  
36  
37  
38  
39  
40  
41  
42  
43  
44  
45  
46  
47  
48  
49  
50  
51  
52  
53  
54  
55  
56  
57  
58  
59  
60

44-15. [Teruaki Iwamoto, Shiari Nozawa, Miki Yoshiike, et al. Semen quality of fertile Japanese men: a cross-sectional population-based study of 792 men. \*BMJ Open\* 2013;\*\*3\*\*: e002223.](#)

Formatted: Finnish

Formatted: Font: Italic

Formatted: Font: Bold

45-16. Vital statics in Japan, Ministry of Health, Labour and Welfare Japan, 2009

46-17. Jensen TK, Slama R, Ducot B, et al. Regional differences in waiting time to pregnancy among fertile couples from four European cities. *Hum Reprod* 2001;**16**:2697-2704.

47-18. Eustache F, Auger J, Cabrol D, et al. Are volunteers delivering semen samples in fertility studies a biased population? *Hum Reprod* 2004;**19**:2831-7.

48-19. Jørgensen N, Liu F, Andersson AM, et al. Serum inhibin-B in fertile men is strongly correlated with low but not high sperm counts: a coordinated study of 1,797 European and US men. *Fertil Steril* 2010;**94**:2128-34.

49-20. Jørgensen N, Auger J, Giwercman A, et al. Semen analysis performed by different laboratory teams: an intervariation study. *Int J Androl* 1997;**20**:201-208.

20-21. Cooper TG, Brazil C, Swan SH, et al. Ejaculate volume is seriously underestimated when semen is pipetted or decanted into cylinders from the collection vessel. *J Androl* 2007;**28**:1-4.

21-22. Gao J, Gao ES, Yang Q, et al. Semen quality in a residential, geographic and age representative sample of healthy Chinese men. *Hum Reprod* 2007;**22**:477-484.

22-23. Li Y, Lin H, Ma M, et al. Semen quality of 1346 healthy men, results from the Chongqing area of southwest China. *Hum Reprod* 2009;**24**:459-469.

23-24. Junqing W, Qiuying Y, Jianguo T, et al. Reference value of semen quality in Chinese young men. *Contraception* 2002;**65**:365-368.

1  
2  
3  
4  
5  
6  
7  
8  
9 | ~~24-25.~~ Storgaard L, Bonde JP, Ernst E, *et al.* Does smoking pregnancy affect son's sperm  
10 count?. *Epidemiology* 2003;**14**:278-86

11  
12 | ~~25-26.~~ Jensen TK, Jørgensen N, Punab M, *et al.* Association of in utero exposure to ma-  
13 ternal smoking with reduced semen quality and testis size in adulthood: a  
14 cross-sectional study of 1,770 young men from the general population in five European  
15 countries. *Am J Epidemiol* 2004;**159**:49-58.

16  
17  
18  
19 | ~~27.~~ Ranvborg TL, Jensen TK, Andersen AM, *et al.* Prenatal and adult exposures to smoking  
20 are associated with adverse effects on reproductive hormones, semen quality, final  
21 height and body mass index. *Hum Reorod* 2011;**26**:1000-11.

22  
23  
24  
25  
26 | ~~26-28.~~ [The National Health and Nutrition Survey 2008. Ministry of Health, Labour and](#)  
27 [Welfare. Japan](#)

28  
29  
30 | ~~27-29.~~ Jørgensen N, Asklund C, Carlsen E, *et al.* Coordinated European investigations of  
31 semen quality: Results from studies of Scandinavian young men is a matter of concern.  
32  
33 *Int J Androl* 2006;**29**:54-61..

34  
35  
36 | ~~28-30.~~ Axelsson J, Rylander L, Ringnell-Hybdom A, *et al.* No secular trend over the last  
37 decade in sperm counts among Swedish men from general population. *Hum Reprod*  
38 2011;**26**:1012-16

39  
40  
41 | ~~29-31.~~ Tsarev I, Gagonin V, Giwercman A, *et al.* Sperm concentration in Latvian military  
42 conscripts as compared with other countries in the Nordic-Baltic area. *Int J Androl*  
43 2005;**28**:208-214.

44  
45  
46 | ~~30-32.~~ Jørgensen N, Vierula M, Jacobsen R, *et al.* Recent adverse trends in semen qual-  
47 ity and testis cancer incidence among Finnish men. *Int J Androl* 2011;**34**:e37-48.

48  
49  
50 | ~~31-33.~~ World Health Organisation. WHO Laboratory Manual for the Examination and  
51 Processing of Human Semen. 5<sup>th</sup> edn. 2010.



1  
2  
3  
4  
5  
6  
7  
8  
9 [http://whqlibdoc.who.int/publications/2010/9789241547789\\_eng.pdf](http://whqlibdoc.who.int/publications/2010/9789241547789_eng.pdf)

10 | ~~32-34.~~ Bonde JP, Ernst E, Jensen TK, *et al.* Relation between semen quality and fertility:  
11 | a population-based study of 430 first-pregnancy planners. *Lancet* 1998;**352**:1172-7.  
12 |

13 | ~~33-35.~~ Guzick DS, Overstreet JW, Factor-Litvak P, *et al.* Sperm morphology, motility, and  
14 | concentration in fertile and infertile men. *N Engl J Med* 2001;**345**:1388-93.  
15 |

16 | ~~34-36.~~ Slama R, Eustache F, Ducot B, *et al.* Time to pregnancy and semen parameters: a  
17 | cross-sectional study among fertile couples from four European cities. *Hum Reprod*  
18 | 2002;**17**:503-15.  
19 |

20 | ~~35-37.~~ Jedrzejczak P, Taszarek-Hauke G, Hauke J, *et al.* Prediction of spontaneous  
21 | conception based on semen parameters. *Int J Androl* 2008;**31**:499-507.  
22 |  
23 |  
24 |  
25 |  
26 |  
27 |  
28 |  
29 |  
30 |  
31 |  
32 |  
33 |  
34 |  
35 |  
36 |  
37 |  
38 |  
39 |  
40 |  
41 |  
42 |  
43 |  
44 |  
45 |  
46 |  
47 |  
48 |  
49 |  
50 |  
51 |  
52 |  
53 |  
54 |  
55 |  
56 |  
57 |  
58 |  
59 |  
60 |

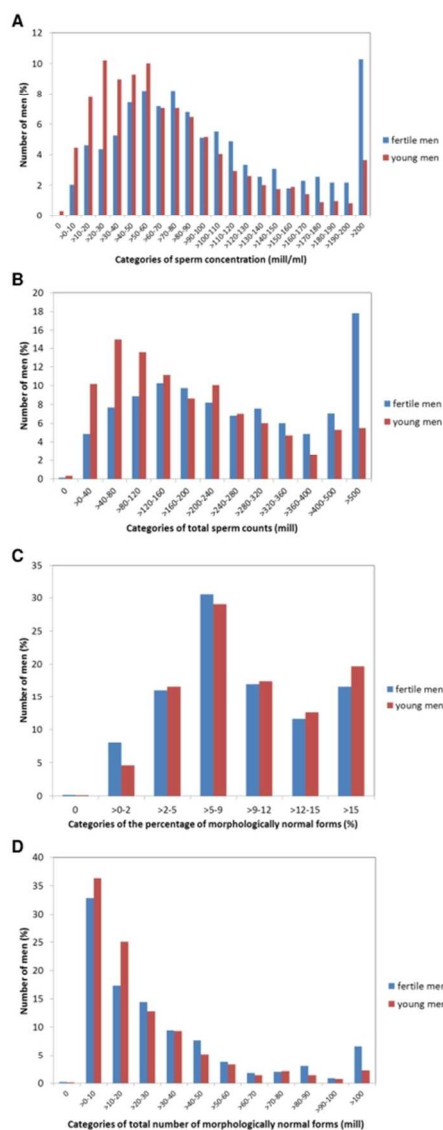

The semen results of the 1,559 young men in comparison with those of the 792 fertile men. The semen variables differed between these groups, with fertile men having higher sperm concentration (A,  $p < 0.0001$ ), total sperm count (B,  $p < 0.0001$ ), total number of morphologically normal spermatozoa (D,  $p < 0.0001$ ) than young men, while the percentage of normal spermatozoa did not differ between the groups (C,  $p = 0.05$ ).

90x127mm (300 x 300 DPI)

**Table A1:** Semen quality of subgroup of 1,307 healthy young men from four cities in Japan.

|                                                                                                                                         | Observed      |                    | Adjusted         |
|-----------------------------------------------------------------------------------------------------------------------------------------|---------------|--------------------|------------------|
|                                                                                                                                         | Mean (SD)     | Median (5-95)      | Median (95%CI)   |
| <b>Semen volume (ml)</b>                                                                                                                |               |                    |                  |
| Entire study population                                                                                                                 | 2.9 (1.4)     | 2.8 (1-5.6)        | 3.0 (2.8-3.1)    |
| Kawasaki                                                                                                                                | 2.8 (1.3)     | 2.6 (0.9-5.3)      | 2.8 (2.6-3.0)    |
| Osaka                                                                                                                                   | 2.9 (1.4)     | 2.7 (1-5.6)        | 2.9 (2.6-3.1)    |
| Kanazawa                                                                                                                                | 3.3 (1.5)     | 3 (1.2-6.5)        | 3.2 (2.9-3.5)    |
| Nagasaki                                                                                                                                | 3 (1.4)       | 3 (1-5.4)          | 3.0 (2.8-3.3)    |
| p-value                                                                                                                                 |               |                    | p=0.011          |
| <b>Sperm concentration (mill/ml)</b>                                                                                                    |               |                    |                  |
| Entire study population                                                                                                                 | 74.4 (59.8)   | 60.2 (10.7-187)    | 62 (54-70)       |
| Kawasaki                                                                                                                                | 72.5 (62.6)   | 56.8 (10.6-187.5)  | 58 (50-68)       |
| Osaka                                                                                                                                   | 74.7 (62.2)   | 59.1 (10.5-195.3)  | 65 (55-78)       |
| Kanazawa                                                                                                                                | 73.5 (56.1)   | 61.3 (7.5-183.3)   | 61 (51-72)       |
| Nagasaki                                                                                                                                | 78.9 (54.7)   | 71.3 (12-181.4)    | 66 (55-78)       |
| p-value                                                                                                                                 |               |                    | p=0.121          |
| <b>Total sperm count (mill)</b>                                                                                                         |               |                    |                  |
| Entire study population                                                                                                                 | 206.3 (189.8) | 165.3 (19.7-514.5) | 181 (158-209)    |
| Kawasaki                                                                                                                                | 192.5 (203.5) | 150.1 (17-494.7)   | 164 (140-194)    |
| Osaka                                                                                                                                   | 198.2 (178.8) | 159.8 (28.4-496.4) | 188 (154-229)    |
| Kanazawa                                                                                                                                | 232.1 (192.2) | 185.4 (17-561.3)   | 192 (158-234)    |
| Nagasaki                                                                                                                                | 219.3 (163.1) | 183.8 (31.2-553.2) | 198 (164-239)    |
| p-value                                                                                                                                 |               |                    | p=0.008          |
| <b>Motile spermatozoa (%)</b>                                                                                                           |               |                    |                  |
| Entire study population                                                                                                                 | 67.4 (14.4)   | 69 (42-88)         | 66 (64-68)       |
| Kawasaki                                                                                                                                | 66.1 (14.4)   | 67 (40-86)         | 64 (62-67)       |
| Osaka                                                                                                                                   | 66.8 (11.8)   | 67.5 (52-84)       | 64 (61-67)       |
| Kanazawa                                                                                                                                | 62.4 (13.7)   | 64 (38-83)         | 60 (57-63)       |
| Nagasaki                                                                                                                                | 75.6 (14.3)   | 78 (49-92)         | 75 (72-77)       |
| p-value                                                                                                                                 |               |                    | p<0.0001         |
| <b>Morphologically normal spermatozoa (%) a</b>                                                                                         |               |                    |                  |
| Entire study population                                                                                                                 | 10.4 (6.1)    | 9.5 (2.5-22)       | 9.7 (8.8-10.5)   |
| Kawasaki                                                                                                                                | 10.7 (6.4)    | 9 (2.5-23)         | 9.4 (8.1-10.8)   |
| Osaka                                                                                                                                   | 9.2 (5.3)     | 8.5 (1.5-19)       | 8.3 (7.1-9.5)    |
| Kanazawa                                                                                                                                | 10 (6.2)      | 8.5 (1.5-21.5)     | 9.1 (8.0-10.2)   |
| Nagasaki                                                                                                                                | 11.8 (6)      | 11 (3.5-22.5)      | 11.1 (10.0-12.2) |
| p-value                                                                                                                                 |               |                    | p=0.0007         |
| <b>Observed:</b> Results based on raw data.                                                                                             |               |                    |                  |
| <b>SD:</b> Standard deviation.                                                                                                          |               |                    |                  |
| <b>(5-95):</b> 5-95th percentile.                                                                                                       |               |                    |                  |
| <b>Adjusted median and 95%CI</b> (confidence interval) calculated by linear regression analysis.                                        |               |                    |                  |
| Semen volume, sperm concentration and total sperm counts adjusted to a period of ejaculation abstinence of 96 h for a 21 years-old-man. |               |                    |                  |
| Motility and morphology adjusted for a 21 years-old-man, winter season.                                                                 |               |                    |                  |
| See text for further explanation.                                                                                                       |               |                    |                  |
| <b>p-value:</b> Based on regression analyses of cubic root transformed values, comparing all four groups.                               |               |                    |                  |
| <b>a:</b> Morphology results only available for 727 men.                                                                                |               |                    |                  |

STROBE 2007 (v4) Statement—Checklist of items that should be included in reports of *cross-sectional studies*

| Section/Topic                | Item # | Recommendation                                                                                                                                                                       | Reported on page # |
|------------------------------|--------|--------------------------------------------------------------------------------------------------------------------------------------------------------------------------------------|--------------------|
| Title and abstract           | 1      | (a) Indicate the study's design with a commonly used term in the title or the abstract                                                                                               | 1, 4               |
|                              |        | (b) Provide in the abstract an informative and balanced summary of what was done and what was found                                                                                  | 3, 4               |
| <b>Introduction</b>          |        |                                                                                                                                                                                      |                    |
| Background/rationale         | 2      | Explain the scientific background and rationale for the investigation being reported                                                                                                 | 3-5                |
| Objectives                   | 3      | State specific objectives, including any prespecified hypotheses                                                                                                                     | 4, 5               |
| <b>Methods</b>               |        |                                                                                                                                                                                      |                    |
| Study design                 | 4      | Present key elements of study design early in the paper                                                                                                                              | 4, 5               |
| Setting                      | 5      | Describe the setting, locations, and relevant dates, including periods of recruitment, exposure, follow-up, and data collection                                                      | 5, 6               |
| Participants                 | 6      | (a) Give the eligibility criteria, and the sources and methods of selection of participants                                                                                          | 5, 6               |
| Variables                    | 7      | Clearly define all outcomes, exposures, predictors, potential confounders, and effect modifiers. Give diagnostic criteria, if applicable                                             | 3, 7, 8            |
| Data sources/<br>measurement | 8*     | For each variable of interest, give sources of data and details of methods of assessment (measurement). Describe comparability of assessment methods if there is more than one group | 5-8                |
| Bias                         | 9      | Describe any efforts to address potential sources of bias                                                                                                                            | 8, 9               |
| Study size                   | 10     | Explain how the study size was arrived at                                                                                                                                            | 5-6                |
| Quantitative variables       | 11     | Explain how quantitative variables were handled in the analyses. If applicable, describe which groupings were chosen and why                                                         | 7-10               |
| Statistical methods          | 12     | (a) Describe all statistical methods, including those used to control for confounding                                                                                                | 8-10               |
|                              |        | (b) Describe any methods used to examine subgroups and interactions                                                                                                                  | 8, 9               |
|                              |        | (c) Explain how missing data were addressed                                                                                                                                          | N/A                |
|                              |        | (d) If applicable, describe analytical methods taking account of sampling strategy                                                                                                   | 5, 6               |
|                              |        | (e) Describe any sensitivity analyses                                                                                                                                                | 7                  |
| <b>Results</b>               |        |                                                                                                                                                                                      |                    |

|                          |     |                                                                                                                                                                                                                                                                                                                                                                                                               |                               |
|--------------------------|-----|---------------------------------------------------------------------------------------------------------------------------------------------------------------------------------------------------------------------------------------------------------------------------------------------------------------------------------------------------------------------------------------------------------------|-------------------------------|
| Participants             | 13* | (a) Report numbers of individuals at each stage of study—eg numbers potentially eligible, examined for eligibility, confirmed eligible, included in the study, completing follow-up, and analysed<br>(b) Give reasons for non-participation at each stage<br>(c) Consider use of a flow diagram                                                                                                               | 5, 6                          |
| Descriptive data         | 14* | (a) Give characteristics of study participants (eg demographic, clinical, social) and information on exposures and potential confounders<br>(b) Indicate number of participants with missing data for each variable of interest                                                                                                                                                                               | 6, 17 (Table 1)               |
| Outcome data             | 15* | Report numbers of outcome events or summary measures                                                                                                                                                                                                                                                                                                                                                          | 10-12, 18, 19 (Table 2 and 3) |
| Main results             | 16  | (a) Give unadjusted estimates and, if applicable, confounder-adjusted estimates and their precision (eg, 95% confidence interval). Make clear which confounders were adjusted for and why they were included<br>(b) Report category boundaries when continuous variables were categorized<br>(c) If relevant, consider translating estimates of relative risk into absolute risk for a meaningful time period | 10-12, 18, 19 (Table 2 and 3) |
| Other analyses           | 17  | Report other analyses done—eg analyses of subgroups and interactions, and sensitivity analyses                                                                                                                                                                                                                                                                                                                |                               |
| <b>Discussion</b>        |     |                                                                                                                                                                                                                                                                                                                                                                                                               |                               |
| Key results              | 18  | Summarise key results with reference to study objectives                                                                                                                                                                                                                                                                                                                                                      | 3, 4, 12                      |
| Limitations              | 19  | Discuss limitations of the study, taking into account sources of potential bias or imprecision. Discuss both direction and magnitude of any potential bias                                                                                                                                                                                                                                                    | 12-16                         |
| Interpretation           | 20  | Give a cautious overall interpretation of results considering objectives, limitations, multiplicity of analyses, results from similar studies, and other relevant evidence                                                                                                                                                                                                                                    | 14-16                         |
| Generalisability         | 21  | Discuss the generalisability (external validity) of the study results                                                                                                                                                                                                                                                                                                                                         | 15, 16                        |
| <b>Other information</b> |     |                                                                                                                                                                                                                                                                                                                                                                                                               |                               |
| Funding                  | 22  | Give the source of funding and the role of the funders for the present study and, if applicable, for the original study on which the present article is based                                                                                                                                                                                                                                                 | 20                            |

\*Give information separately for cases and controls in case-control studies and, if applicable, for exposed and unexposed groups in cohort and cross-sectional studies.

**Note:** An Explanation and Elaboration article discusses each checklist item and gives methodological background and published examples of transparent reporting. The STROBE checklist is best used in conjunction with this article (freely available on the Web sites of PLoS Medicine at <http://www.plosmedicine.org/>, Annals of Internal Medicine at <http://www.annals.org/>, and Epidemiology at <http://www.epidem.com/>). Information on the STROBE Initiative is available at [www.strobe-statement.org](http://www.strobe-statement.org).
